# Supplementary material for: Conserved Antagonization of Type I Interferon Signaling by Arterivirus GP5 Proteins
Source: Preprints.org preprint supplement (doi:10.20944/preprints202407.0166.v1), 2024-07-02
Supplement: Supplementary file 2 [file supplementary]

**Supplementary Table S1. Synthesized DNAs for generating plasmids encoding GP5 proteins**

1

|                                          |                                                                                                                                                                                                                                                                                                                                                                                                                                                                                                                                                                                                                                                                                                                                                                                            |
|------------------------------------------|--------------------------------------------------------------------------------------------------------------------------------------------------------------------------------------------------------------------------------------------------------------------------------------------------------------------------------------------------------------------------------------------------------------------------------------------------------------------------------------------------------------------------------------------------------------------------------------------------------------------------------------------------------------------------------------------------------------------------------------------------------------------------------------------|
| PRRSV-2 (GD)<br>Accession# ABV02057.1    | TGACTACGCG <u>ACCGGTTT</u> GGGAAAATGCCTCACTGCGTGTGCTGCTCAAGA<br>TTGCTGTTTCTTTGGTGTATCGTGCCCTTCTACCTGGCAGTCCTTGTGAACGCA<br>TCTAATAATAACAGCAGCCATATACAACCTCATATACAATTTGACATTGTGTG<br>AGCTGAACGGGACTGACTGGCTCGCACAGAAATTTGATTGGGCTGTGCGAAA<br>CGTTCGTGATTTTCCCAGTTCTTACGCATATTGTTAGCTATGGTGCCTTGACTA<br>CCTCACACTTTCTCGACACGGTCGGACTGGCCACCGTCTCTACGGCCGGATA<br>CTATCACGGCAGGTACGTCTTGTCTTCAATTTACGCGGTGTGTGCCCTCGCTG<br>CACTTATCTGTTTTGTTATTAGATTGGCAAAAACTGTATGAGCTGGAGGTAC<br>TCTTGACAAGGTACACCAATTTCTCTGGATACCAAGGGCCGCTGTACC<br>GCTGGCGGTACCTGTCATAGTCGAAAAAGGCGGCAAAGTGGAGGTGAGG<br>GACATCTGATAGACCTTAAACGCGTCGTCTGGACGGCAGTGCCGCAACTCC<br>GCTGACAAGGGTGTGAGCAGAGCAATGGGGACGGTTGT <u>GAGCTAGCAGATC</u><br>TTTTT                                                                         |
| PRRSV-1 (Zad-1)<br>Accession# ABC74828.2 | TTTTGGCAAAGAATTCGCCACCATGAGAGATCATATGGTTTTGCATGAGTAC<br>GTGAACGCAGCTGGTATCACATGC <u>ACCGGT</u> AGATGTAGTCGCACTTTGGGTC<br>AGCCTAGTACGCACCATTTTTATCTTTGGTGGCTTTTTTTGCTTTGCATAGGCC<br>TCTCCTGGTCATTTGCTGATGGGAATGGAAATAGCAGTACCTACCAATACAT<br>CTATGATCTTACGATATGTGAACTTAATGGCACCAACTGGTTGGCGTCACGC<br>TTCAGCTGGGTTGTGGAAAGTTTTGTGTTTTATCCTGTGCTCACTCACATTCTT<br>TCTCTCGGGTTCCTGACCACTAGTCATTTCTTCGATATGCTCGGTCTGGGTGC<br>GGTGGCTGCTGCAGGCTTTCATGGTCAGAGGTACGTCTTGTATCTATATACG<br>GGATTAGCGCCCTGGCTGCATTCGTCTGTTTCGCAATTCGGGCTGCAAAAAA<br>CTGCATGGCGTGCAGGTACGCCTGCACGCGTTCACTAACTTCATTGTTGAC<br>GACAGAGGACGCATACATCGGTGGAAGTCTCCTGTGCTCGTGGA AAAA ACTT<br>GGCAAGGCAGAGGTGGGAGGCAACTTGGTCACCATAAAGCACGTTATTCTT<br>GAAGGTGTGAAGGCTAAACCTTTGGCTAGAACTGCAGCTGAGCAGT <u>AGGCT</u><br>AGCAGATCTTTTT |
| PRRSV-2 (01NP1)<br>Accession# AAP57172.1 | TATCACATGC <u>ACCGGT</u> CTCGGTAAATGTCTTACCGCTGGCTGCTGTTCTCGCC<br>TTCCGTTTCTCTGGTGCATCGTCCCCTTTTGTGTTGCTGCTCTCGCTAATGCTTC<br>TAACAGCTCTTCCCATCTCCAGCTGATATACAACCTTACCATTTGCGAACTTA<br>ACGGTACGGATTGGCTCAAACATAACTTTGACTGGGCGGTGGAGACCTTCGT<br>GATCTTCCCTGTGCTGACTCACATTGTGTCATACGGGGCACTCACTACTTCCC<br>ATTTCTTGGACGCAGTTGGTCTCATCACAGTCTCAACCGCAGGTTACTACCAT<br>GGACGGTATGTTCTCAGTTCTATCTACGCTGTTTGCGCACTTGCTGCGTTGAT<br>ATGCTTCATTATTAGGCTTACGAAGAATTGTATGAGCTGGCGGTACTCTTGCA<br>CCCGCTACACGAATTTTGTCTTGACACAAAAGGAAAATTGTACCGCTGGA                                                                                                                                                                                                                                                       |

|                                                        |                                                                                                                                                                                                                                                                                                                                                                                                                                                                                                                                                                                                                                                                                                         |
|--------------------------------------------------------|---------------------------------------------------------------------------------------------------------------------------------------------------------------------------------------------------------------------------------------------------------------------------------------------------------------------------------------------------------------------------------------------------------------------------------------------------------------------------------------------------------------------------------------------------------------------------------------------------------------------------------------------------------------------------------------------------------|
|                                                        | GGAGCCCAGTGATTATCGAGAAGGGCGGTAAAGTTGAGGTCGGTGGGCATC<br>TGATTGACCTTAAACGGGTTGTTCTCGACGGTAGTGCGGCCACCCCGGTCAC<br>TCGGGTTTCAGCAGAGCAGTGGGGTAGGCCATAGGCTAGCAGATCTTTTT                                                                                                                                                                                                                                                                                                                                                                                                                                                                                                                                       |
| PRRSV-2 (NADC30)<br>Accession# AFP43978.1              | TATCACATGCACCGGTCTCGGTAAATGTCTCACAGCCGGGTATTGTTACAG<br>CTGCCGTTTCTCTGGTGTATCGTGCCGTTCTGCTTCGCAGCATTGGTGAATGC<br>TAATTCCAACCTCTAGTAGCCATTTGCAACTTATTTACAACCTCACAATCTGTG<br>AATTGAATGGAACAGACTGGCTTAATGAAAGGTTCTATTGGGCCGTGCGAGA<br>CATTTGTTATTTTCCCTGTCCTGACCCACATAGTTTCTATGGTGCTCTTACGA<br>CATCACATTTCTGGACACGGTTGGGCTGATTACGGTTTCCACGGCAGGCTA<br>TTACCACAGGCGCTACGTCCTCTCATCTATCTATGCCGTTTGTGCGCTGGCAG<br>CTTTGATTTGTTTTGCGATTTCGCTCGCAAAGAACTGCATGAGTTGGCGCTAC<br>TCTTGACAAGGTACACTAACTTTTTGCTGGACACAAAAGGTAAATTGTACC<br>GCTGGCGCTCTCCTGTCATAATCGAAAAGGAGGCAAGGTGGATGTGCGGG<br>GGCACCTCATAGACTTGAAGCGCGTGGTGCTGGACGGTTCCGCAGCGACTCC<br>AGTTACCAAAATCAGTGCTGAACAATGGGGGAGGCCATGAGCTAGCAGATC<br>TTTTT   |
| PRRSV-2 (PRRSV0000008<br>973)<br>Accession# ACG54454.1 | TATCACATGCACCGGTCTGGGAAAATGCCTGACAGCCGGCTGCTGCTCCAG<br>GCTTCTGTCACTTTGGTGCATTGTCTTTTCTGTTTCGCAGTGCTGGTGAACGC<br>CAACAATAGTTCTTCTTCCCACTCCCAACTTATATACAACCTGACTATCTGCG<br>AGCTTAACGGAACAAAATGGTTGGGTAACAACCTTAACTGGGCGGTTGAGA<br>CCTTTGTTATCTTTCCTGTCCTCACTCATATAGTTAGTTATGGTGCTCTTACTA<br>CCAGCCACTTTCTTGACACGGTTGGCCTGGTGACGGTCAGTACCGCTGGATA<br>TTACCATGGTTCGGTATGTCCTTAGCAGTGTTTACGCTGTCTGTGCCTTGGCGG<br>CGTTGATCTGTTTCATTATACGGTTCGTTAAAACTGTATGTCTTGGAGATAT<br>TCATGTACGCGGCACACCAATTTTCTTTTGGATACGAAAGGACGCCTGTACA<br>GGTGGCGCTCACCTGTGATCGTCGAGAAGAACGGAAGAGTCGAGGTCGGAA<br>ACCATCTTATCGATCTGAAGAGAGTCGTGCTCGACGGCAGCGCGGCGACAC<br>CGCTTACGCGCGTCAGTGCAGAGCAATGGGGAAGACCCTGAGCTAGCAGAT<br>CTTTTT |
| PRRSV-2 (XW008)<br>Accession# AHC53194.1               | TATCACATGCACCGGTTTGGGCAGGTGCCTGACCGCTGGGTATTGTTCAAGA<br>CTTCTGAGCCTCTGGTGCATCGTTTCTTTCTGGTTTGCCGTGCTCGTTAACGCC<br>AATAATACGAGCTCATCTCACTTCCAGTTGATCTATAACCTGACACTGTGTG<br>AGTTGAACGGCACCGAATGGCTTGGGAACAAATTCAACTGGGCAGTGGA<br>CCTTCGTGATATTCCCAGTGCTCACACATATAGTTTCTATGGGGCGCTGACA<br>ACCAGTCACTTTTTGGACACAGTCGGCCTCGTGACCGTTTCTACAGCTGGCTT<br>CGTTCACGAACGCTACGTTCTTTCTTCAGTGACGCGGTGTGCGCGCTCGCTG<br>CACTCATTTGTTTCACTATACGGTTGGCTAAGAATTGCATGAGTTGGCGGTAC<br>AGCTGCACCAGGTACACTAACTTCTGCTCGACACCAAAGGGAAACTGTAT<br>AGATGGCGGTCACCTGTGATTATTGAGAAAGGTGGAAGAGTCGAGGTGGAG<br>GGACATCTCATCGACTTGAAGCGCGTCGTCCTGGACGGGTCAGCCGCTACTC                                                                      |

|                                                |                                                                                                                                                                                                                                                                                                                                                                                                                                                                                                                                                                                                                                                     |
|------------------------------------------------|-----------------------------------------------------------------------------------------------------------------------------------------------------------------------------------------------------------------------------------------------------------------------------------------------------------------------------------------------------------------------------------------------------------------------------------------------------------------------------------------------------------------------------------------------------------------------------------------------------------------------------------------------------|
|                                                | CGCTGACGCGCGTTTCCGCAGAACAGTGGGGAAGGCTCTAGGCTAGCAGATCTTTTT                                                                                                                                                                                                                                                                                                                                                                                                                                                                                                                                                                                           |
| PRRSV-2 (GXLA12-2013)<br>Accession# AGL08390.1 | TATCACATGCACCGGTCTTGGTAAATGTAGTATTGCAGGCTATTGCAGTCAGTCTCTTTTTTGTGGTGTATCGTTCCTTTCTGCTCAATAGCACTCGTTTCCGCGAACGGAAACAGCTCATCTTATTTCCAGTTGATTTATAATTTGACCTTGTGTGAGCTTAACGGCACCGACTGGCTCGCTGCTAAGTTTGATTGGGCAGTTGAATGCTTCGTTATTTTTCCCGTGCTGACTCATATTGTCTCATATGGAGCCCTGACCACGAGCCATTTCTGGATACGGTCAGCTTGGTCACAGTCAGTACCGCAGGGTTCATCACGGGAGGTACGTGCTCAGTAGCATATACGCAGTGTGTGCGTTCGCGGCGTTTATCTGTTTTGTCATTGCGCTCGTCAAGAACTGTATGAGCTGGAGGTACTCATGTACCCGCTATACTAATTTCTTCTTGACACAAAAGGGAAGATATACAGGTGGCGCAGCCAGTTATTATTGAGAAGGGAGGAAAGGTGGAGGTCGGGGTCACTTGATAGACCTCAAGCGCGTTGTCTTGACGGTTCAGCGGCGACACCTGTGACAAAGATTTACGCAGAGCGGTGGGGTCACCCATAGGCTAGCAGATCTTTTT   |
| PRRSV-2 (MD001)<br>Accession# AKS03951.1       | TATCACATGCACCGGTGGGTAAGTGCCTGACAGTGGGATGCTGTTCAAGAAGCCTGTTTTTGTGGTGTATAGTGCCTTTTTGCCTTGACGCGTTGGTCTCCGCGAATGGCAACAGTTCTTCTTATTCACAGTTGATCTATAACCTTACCTTGTGTGAGTTGAATGGTACTGATTGGCTTGCCAAAAAGTTCGACTGGGCAGTGGAACCTTTGTGATTTTTCCCGTTATAACACACATCGTTTCCTACGGAGCCCTCACCACGAGTCACCTTCTGGATACTGTCGGATTGGTCACCGTTTCTACAGCGGGTTTCTACCACGGAAGGTATGTGCTCAGTAGTATCTATGCGGTCTGCGCGTTGGCAGCACTCATCTGTTTTGTCATCCGGCTCGCCAAGAATTGTATGTCTTGCGCTATTCTGCACACGCTATACTAAGTTTTTGCTTGATACGAAGGGCAGAATATATCGGTGGAGATCTCCAGTTATTATCGAAAAGGGCGGCAAAGTGGAAGTCGAGGGACACCTCATTGACTTGAAGAGAGTGGTGCTCGACGGTTCCGCAGCAACTCCCGTCACCAGGATACCGGCGGAAAGATGGGGGAGGCCATAAGCTAGCAGATCTTTTT |
| PRRSV-2 (EDRD-1)<br>Accession# BAG49673.1      | TATCACATGCACCGGTCTCGGAAAGTGTCTTACCGCCGGGTGCTGTTACGCTTGCCATTCTCTGGTGTATTGTGCCGTTCTGCCTGGCGGCACTCGTGAACGCAGCGACAGCTCATCCTCCACCTTCAACTCATTTACAACCTGACTCTGTGCGAACTCAACGGTACGGATTGGCTCGCGGACAAGTTCGACTGGGCCGTGGAGAGTTTTGTTATATTTCCCGTTCTTACGCACATAGTTAGCTATTGCGCATTGACGACTTCACACTTCCTCGATACAGTCGGCCTGGTTGCAGTTTCCACGGCCGGTTTATACCACGGGCGGTACGTGCTTCTTCTATATATGCTGTTTGCGCACTTGCAGCTCTGGTCTGCTTCGTCATAAGATTGACGAAGAATTGCATGAGCTGGCGGTACTCCTGCACCAGGTACACAACTTTTTGTTGGATACAAAGGGTAGATTGTATAGATGGAGGAGCCCGGTCATTATTGAGAAGGGTGGTAAAGTCGAGGTGGAGGGGCACCTCATTGATCTGAAGCGGGTTGTGCTGGACGGATCTGCAGCAACACCCATTACGAAGGTCAGCGCAGAGCAATGGGGCCATCCGTAGGCTAGCAGATCTTTTT  |

|                                                         |                                                                                                                                                                                                                                                                                                                                                                                                                                                                                                                                                                                                                                                                                                      |
|---------------------------------------------------------|------------------------------------------------------------------------------------------------------------------------------------------------------------------------------------------------------------------------------------------------------------------------------------------------------------------------------------------------------------------------------------------------------------------------------------------------------------------------------------------------------------------------------------------------------------------------------------------------------------------------------------------------------------------------------------------------------|
| PRRSV-2 (Miyagi08-2)<br>Accession# BAJ14526.1           | TATCACATGCACCGGCTGCGGCAAGTGTCTCACTGCCGGATGCTGTCTGAGA<br>CTCCCTTTTAGTTGGTGCATTATGCCCTTTTGTCTTGCTGTGTTGGTCAACGCG<br>AATGGCAACTCAAGTAGCCACCTTCAGCTTATTTACAATTTGACTCTTTGCGA<br>ACTTAACGGTACGGACTGGCTTGCTGGAACTTCGACTGGGCAGTGGAGAG<br>TTTTGTTATTTTTCCTGTCTCACCATATAGTTTCATATGGGGCACTTACGAC<br>ATCCCATTTCCCTTGACACGGTGGGACTTGTACCGTTTCAACCACTGGTTTTT<br>ACCATGAAAGGTATGTCTTGAGTAGTATCTATGCAGTGTGTGCCCTTGCTGC<br>GCTCATTTGCTTCGTCATTAGATTGACGAAAAATTGTATGTCCTGGAGGTACT<br>CATGCACGAGGTACACAACTTTCTTTTGGATACTAAAGGTAGATTGTACCG<br>CTGGAGGTCACCTGTGATTATAGAAAAAGGTGGTAAGGCTGAAGTCGAGGG<br>GCATCTCATCGACCTGAAAAGGGTTGTTCTTGATGGGAGCGCGGCTACTCCC<br>ATAACGAAAGTCAGTGTGAACAGTGGGGGAGACCTTGAGCTAGCAGATCT<br>TTTT  |
| PRRSV-2 (RespPRRS vac<br>cine)<br>Accession# AAD27656.1 | TATCACATGCACCGGCTTGAGAAGTGTCTCACCGCAGGATGTTGTTCCCAA<br>CTTCTTAGTCTTTGGTGTATAGTTCCATTCTGCTTCGCTGTCTTGCTAACGCT<br>TCAAATGACTCCTCCTCACACCTCCAGCTCATCTATAATCTCACACTCTGTGA<br>GCTCAACGGCACAGACTGGCTGGCGAATAAGTTTGATTGGGCCGTGGAGTCT<br>TTTGTTCATATTTCCAGTCTGACTCATATAGTCTCCTACGGTGCCTGACTAC<br>CAGCCACTTTTTGGATACCGTCGCGCTCGTTACCGTTAGCACTGCTGGATTG<br>TTCATGGAAGGTATGTGTTGTCTCAATATACGCGGTGTGTGCGTTGGCCGCC<br>CTCACCTGCTTTGTTATCAGATTCGCTAAAAATTGTATGTCATGGCGCTACGC<br>CTGTACACGGTACACGAACTTTCTCCTGGACACCAAGGGGGGGCTTTACCGC<br>TGGCGGAGCCCCGTCATAATAGAAAAGAGGGGGCAAAGTCGAAGTGGAGGG<br>ACATCTTATAGACCTGAAGAGAGTCGTTTTGGATGGCAGCGTCGCGACACCG<br>ATTACTCGCGTGTCCGCTGAACAGTGGGGAAGACCTTAAGCTAGCAGATCTT<br>TTT |
| PRRSV-2 (Sar01/2013)<br>Accession# AMW91022.1           | TATCACATGCACCGGTTTGGGAGAATGTCTTACTGCAGGCTGTTGTTCTCAGC<br>TTCTGAGCCTTTGGTGTATCGTCCCATTTGTTTCGCTGTTCTTGCTAATGCTTC<br>AAACGACTCATCATCTCATTTGCAGCTGATCTATAACCTGACGTTGTGTGAGT<br>TGAACGGTACTGACTGGCTTGCGAACAAGTTCGACTGGGCTGTGAGAGTTT<br>CGTTATCTTCCCAGTTTTGACTCATATTGTTTCTTACGGGGCATTGACTACTTC<br>CCATTTCTCGATACCGTTGCTTTGGTCACGGTGTCAACAGCAGGATTTGTTT<br>ATGGTCGCTATGTGCTGAGCAGCATCTACGCGTTTGTGCTCTGGCAGCCCTT<br>ACTTGTTTTGTATCCGCTTCGCTAAAAATTGTATGTCATGGAGGTATGCGTG<br>TACTAGATACACCAACTTTCTGTTGGATACGAAAGGGGGTCTCTACAGATGG<br>AGATCACCCGTCATCATTGAAAAGCGGGGAAAAGTCGAAGTGAAGGACA<br>CCTTATCGATTTGAAACGCGTTGTTCTCGACGGGTCCGTTGCCACCCCATAA<br>CTAGAGTCTCCGCTGAACAGTGGGGTTCGGCCATGAGCTAGCAGATCTTTTT       |
| PRRSV-2 (VR2332)<br>Accession# ABU87666.1               | TATCACATGCACCGGTTTGGAAAAATGTTTGACGGCCGGATGTTATAGTCAA<br>CTCCTCAGCCTTTGGTGTATTGTTCCATTTGTTTCGCTGTTCTTGTAACGCTT<br>CTAATGATTCAAGTAGCCATTTGCAGCTCATATACAACTTGACCCTCTGCGA                                                                                                                                                                                                                                                                                                                                                                                                                                                                                                                                |

|                                                 |                                                                                                                                                                                                                                                                                                                                                                                                                                                                                                                                                                                                                                                                                                          |
|-------------------------------------------------|----------------------------------------------------------------------------------------------------------------------------------------------------------------------------------------------------------------------------------------------------------------------------------------------------------------------------------------------------------------------------------------------------------------------------------------------------------------------------------------------------------------------------------------------------------------------------------------------------------------------------------------------------------------------------------------------------------|
|                                                 | GCTTAATGGAACGGACTGGCTCGCCAACAAGTTCGATTGGGCGGTCTGAGTCT<br>TTCGTTATTTTTCCCGTGCTCACTCACATAGTCTCTTATGGGGCCCTCACTACA<br>TCTCATTTTTTGGATACTGTGCCCCCTCGTCACCGTCAGCACTGCAGGCTTCGT<br>CCACGGAAGATACGTGCTCTCAAGCATATATGCCGTTTGTGCACTGGCAGCC<br>TTGACTTGTTTCGTTATCAGATTTGCGAAGAATTGTATGTCATGGCGCTATGC<br>CTGCACTCGCTATACTAATTTTTTGCTGGATACAAAAGGGCGGCTCTACAGA<br>TGGCGGAGCCCCGTCATAATTGAGAAACGGGGCAAAGTTGAAGTTGAGGGG<br>CACCTGATCGACCTGAAGCGGGTGGTGCTGGATGGCAGCGTGGCTACTCCG<br>ATCACGAGGGTTTCTGCAGAACAGTGGGGCAGGCCATGAGCTAGCAGATCT<br>TTTT                                                                                                                                                                          |
| PRRSV-2 (Ingelvac ATP)<br>Accession# ABJ51873.1 | TATCACATGCACCGGTTTGGGCAGGTGTTGACTGCTGGATGCTGCAGCCGC<br>CTTCTGTCCCTGTGGTGTATCGTCCATTCTGCTTTGCTGCCTTGGTGAATGCT<br>AACTCTAACTCTTCTTCCCACTTGCAGCTCATTTACAATCTGACATTGTGTGA<br>GCTGAACGGCACGGATTGGTTGAAGGACAAATTCGATTGGGCTCTTGAGAC<br>CTTTGTGATCTTTCCCGTCCTCACACATATAGTGAGTTATTCCGCGCTCACAA<br>CGTCTCACTTCTTGGATACGGTGGGGTTGGTCACGGTGAGCACTGCAGGTTTT<br>TATCACGGACGCTATGTTTTGAGCTCTATTTATGCCGTTTGGCCTTGGCAGC<br>TCTTACCTGCTTCGTCATCAGACTGGCGAAAAATTGTATGAGCTGGCGGTAC<br>TCATGTACTAGGTACACTAACTTCCTCCTTGACACGAAGGGAAGATTGTACA<br>GGTGGAGGTCCCCCGTGATTATAGAGAAGGGAGGAAAAGTTCGAGGTGGAA<br>GGCCATCTTATAGACCTCAAAAGAGTTGTCTTGGACGGATCAGTTGCCACTC<br>CTCTTACGCGCGTTTCTGCTGAACAGTGGGGTAGGTTGTAAAGCTAGCAGATC<br>TTTTT  |
| PRRSV-2 (P129)<br>Accession# AAM18563.1         | TATCACATGCACCGGTTTGGGCAAATGTCTTACAGCGGGGTGTTGTAGCCGC<br>TTGTTGAGCCTCTGGTGCATCGTGCCCTTCTGTTTTGCCGTCCTCGGCAGTGCG<br>AACTCTAGCTCAAGTTCTCACTTTCAACTCATTTATAACCTTACCCTGTGTGA<br>GTTGAATGGCACAGACTGGTTGGCCGAGAAATTTGACTGGGCAGTCGAGAC<br>ATTTGTGATTTTTCCAGTGCTCACACATATAGTCTCCTATGGTGCGTTGACCA<br>CTTCACATTTTCTGGACACCGTCGGCTTGGTGACAGTCAGTACAGCGGGATT<br>CTACCACGGAAGATATGTTCTGTCTTCCATCTATGCTGTCTGTGCGCTTGCCG<br>CACTCATTTGTTTCGTCATCAGGTTGGCCAAAAATTGCATGTCCTGGAGGTAT<br>TCTTGTACTCGCTACACTAACTTTCTGTTGGATACGAAAGGACGGTTGTATAG<br>GTGGAGAAGCCCAGTGATTATCGAAAAGGGTGGCAAAGTCGAGGTGGAAG<br>GGCACCTCATTGACCTTAAGCGCGTCGTCCTTGATGGATCCGTGGCTACTCC<br>GCTGACTAGGGTTTCCGCTGAACAGTGGGGAAGGCTGTGAGCTAGCAGATC<br>TTTTT |
| PRRSV-2 (Prime Pac)<br>Accession# ABG76930.1    | TATCACATGCACCGGTTCTCGGAAAATGTTTGACAGCCGGGTGCTGTAGTAGA<br>CTGCTGTCATTTTGGTGTATTGTCCCTTTTGTCTCGCCGTCCTCGTGAATGCC<br>AGCTACAGCAGCTCCTCCCATCTTCAGCTCATATACAACCTTGACACTGTGCG<br>AGCTCAATGGGACCGATTGGTTGGCAAACAAATTTGACTGGGCGGTTCGAGA<br>GTTTCGTTATATTTCCAGTGCTGACTCACATTGTGTCCTATGGAGCCCTCACA                                                                                                                                                                                                                                                                                                                                                                                                                 |

|                                                    |                                                                                                                                                                                                                                                                                                                                                                                                                                                                                                                                                                                                                                                                                                                                          |
|----------------------------------------------------|------------------------------------------------------------------------------------------------------------------------------------------------------------------------------------------------------------------------------------------------------------------------------------------------------------------------------------------------------------------------------------------------------------------------------------------------------------------------------------------------------------------------------------------------------------------------------------------------------------------------------------------------------------------------------------------------------------------------------------------|
|                                                    | <p>ACTTCCCATTTTTTGGATACTGTCGGCCTTGTGACGGTCTCAACGGCCGGTTT<br/> CTACCACGGCAGATACGTGTTGAGTAGTATCTACGCTGTGTGTGCGTTGGCT<br/> GCCTTGATATGTTTTGTGATCAGGCTGGCGAAAAATTGTATGAGCTGGCGGT<br/> ATTCCTGCACTAGATACACCAATTTTCTCCTGGATACGAAAGGCAGATTGTA<br/> TAGGTGGAGGTCCCCAGTTATTATTGAGAAGGGTGGCAAAGTCGAGGTTGA<br/> ATCTCACTTGATCGACCTTAAAAGAGTTGTGCTGGACGGGTCTGCGGCCACG<br/> CCACTGACTAGGGTCTCCGCTGAGCAATGGGGTAGACCTTAGGCTAGCAGA<br/> TCTTTTT</p>                                                                                                                                                                                                                                                                                                      |
| <p>PRRSV-2 (Neb-1)<br/> Accession# ACE87854.1</p>  | <p>TATCACATGCACCGGTCTTGGGAAATGTCTTACTGCCGGATGCTGTAGTAGG<br/> CTGCTCAGCTTGTGGTGTATCGTTCCTTTCTGCTTTGCCGTGCTCGTTAATGCG<br/> AGCTATTCATCATCATCCCATCTTCAGCTCATTTACAACCTGACACTCTGTGA<br/> ACTGAATGGTACGGATTGGCTGGCAAACAAGTTTGATTGGGCAGTCGAGAG<br/> TTTCGTTATCTTCCCGGTTTTGACTCATATCGTGTACATACGGCGCACTCACTA<br/> CTAGCCACTTCCTTGACACGGTGGGCTTGGTGACGGTTTCAACAGCGGGCTT<br/> CTATCATGGCCGGTATGTGCTGAGTTCTATATATGCGGTGTGCGCCTTGGCGG<br/> CTCTGATTGTCTTTGTGATCAGGCTCGCAAAAAATTGCATGTCATGGAGATA<br/> CTCATGTACCCGGTACACCAACTTTCTGCTCGACACAAAGGGACGCCTTTAC<br/> AGGTGGAGATCACCTGTGATAATTGAAAAGGGTGGCAAGGTTGAAGTGGAA<br/> GGGCACCTTATCGACCTCAAGCGCGTGGTTCTCGACGGGTCCGCAGCTACGC<br/> CCCTCACGCGCGTCTCTGCAGAACAGTGGGGGCGGCCCTAAGCTAGCAGAT<br/> CTTTTT</p> |
| <p>PRRSV-2 (CH-1R)<br/> Accession# ACF93752.1</p>  | <p>TATCACATGCACCGGTCTCGGTAAATACTTGACTACCGGGTGCTGTAGTAGA<br/> CTTTTGTCTCTCTGGTGTATAGTTCGGTTTTGCTTCGCTGTTCTGGTCAATGCC<br/> AACTCCAACCTCCTCAAGTCAGTTTCAACTTATCTACAACCTTACGCTGTGCG<br/> AGCTGAATGGCACGGACTGGCTTGCAAATAAGTTTCGATTGGGCAGTCGAGA<br/> CATTCGTTATTTTTCCGGTGCTGACCCATATAGTCTCTTACGGAGCCTTGACT<br/> ACCAGCCATTTCTTGACACAGTGGGCCTGGTTACGGTCTCTACCGCCGGGT<br/> TTTACCATGGACGGTATGTGTTGTCTAGCATTACGCTGTTTGTGCCCTTGCTG<br/> CTCTGATCTGCTTTGTGATTAGACTTGCTAAGAATTGCATGTCTTGGAGATAT<br/> TCATGCACGCGCTATACTAATTTCTTCAGGATACAAAAGGACGGCTGTATA<br/> GATGGCGGTACACAGTGATTGTTGAAAAGGGCGGAAAGGTTGAAGTTGAGG<br/> GGCATCTCATCGACCTCAAACGGGTGGTCTGGATGGGAGTGTGGCTACACC<br/> TCTCACAAGAGTCTCAGCAGAGCAATGGGGAAGGCTTTAAGCTAGCAGATC<br/> TTTTT</p>    |
| <p>PRRSV-2 (HG.RV2)<br/> Accession# AFM37611.1</p> | <p>TATCACATGCACCGGTCTTGGCAAATGCCTGACAGCATGTTGTTGTAGTAGA<br/> TTGCTGTTCTTTGGTGCATCGTCCCTTTTATCTGGCAGTTCTTGCCAATGCG<br/> AGCAATTCTAATTCATCATATACAGCTTATTTACAATCTCACGCTCTGCGA<br/> ACTTAATGGAAGTATTGGCTTGCTCAAAAATTTGATTGGGCTGTGAAACT<br/> TTCGTGATATTCCCGTTCTGACGCACATCGTTAGTTACGGCGCCCTCACCAC<br/> CAGCCACTTCCTGGATACCGTCGGGCTGGCCACTGTCAGCACGGCTGGATAT<br/> TACCACGGCAGATATGTCTTGTCTCTATATATGCTGTCTGCGCCCTCGCTGC</p>                                                                                                                                                                                                                                                                                                                     |

|                                                       |                                                                                                                                                                                                                                                                                                                                                                                                                                                                                                                                                                                                                                                                                                                                    |
|-------------------------------------------------------|------------------------------------------------------------------------------------------------------------------------------------------------------------------------------------------------------------------------------------------------------------------------------------------------------------------------------------------------------------------------------------------------------------------------------------------------------------------------------------------------------------------------------------------------------------------------------------------------------------------------------------------------------------------------------------------------------------------------------------|
|                                                       | <p>ACTCATCTGTTTCGTTATAAGACTTGCGAAGAATTGCATGTCCTGGCGGTAC<br/> AGCTGCACACGCTATACTAATTTCTGCTGGACACTAAAGGACGCCTTTACA<br/> GATGGAGAAGTCCTGTATCGTGGAAAAGGGGGGGAAAGTGGAAGTGGAG<br/> GGTCACCTTATTGATCTCAAGAGAGTTGTTTTGGACGGCAGTGCGGCTACGC<br/> CTCTGACACGGGTAGTGCTGAACAATGGGGGAGACTCTAGGCTAGCAGAT<br/> CTTTT</p>                                                                                                                                                                                                                                                                                                                                                                                                                           |
| <p>PRRSV-2 (JXA1)<br/> Accession# ABL60902.1</p>      | <p>TATCACATGCACCGGCTCTGGGAAATGCCTCACTGCCTGTTGCTGCTCAAGG<br/> CTCCTGTTCTCTGGTGTATCGTTCCTGCTACCTGGCTGTCCTTGTTAATGCC<br/> TCTAATAACAATAGCTCCCATATTCAGTTGATATATAACCTTACTCTTTGCGA<br/> GTTGAATGGAACCGATTGGCTGGCACAGAAGTTCGATTGGGCCGTTGAAACT<br/> TTCGTGATATCCCCGTTCTCACTCACATAGTGAGTTACGGAGCTCTGACGAC<br/> ATCACATTTCTGGATACTGTGGGCCTGGCTACAGTTAGTACGGCTGGCTAC<br/> TATCATGGTAGGTACGTGTTGAGCAGTATATATGCAGTTTGTGCACTGGCGG<br/> CGCTCATCTGCTTCGTGATAAGACTCGCCAAGAATTGCATGTCCTGGCGGTA<br/> TTCTTGTACTAGGTATACGAATTTCTTGCTCGATACAAAAGGAAGACTTTATC<br/> GCTGGCGCTCTCCTGTGATTGTTGAGAAGGGGGGGAAGGTCGAGGTCGAGG<br/> GCCACCTGATTGATCTCAAGCGCGTCGTCCTGGACGGGTCTGCGGCTACTCC<br/> TCTACCCGCGTGTGACCCGAATTGTGGGGAAGACTGTAGGCTAGCAGATCT<br/> TTTT</p> |
| <p>PRRSV-2 (2000-2454)<br/> Accession# ACB41436.1</p> | <p>TATCACATGCACCGGCTCTGGGGAGATGCCTTACGGCGGGCTGTTGTAGTCGG<br/> CTTTTGTCCCTTTGGTGCATTGTGCCGTTTGGTTTGCCGTTCTGGTTCGATGCA<br/> AATAGCAACTCCTCCAGTCACTTCCAGTTGATCTACAATTTGACATTGTGCG<br/> AACTTAACGGGACTGACTGGCTTGATAAAAAGTTCGACTGGGCCGTCGAGA<br/> CCTTTGTGATTTTCCAGTCCTCACGCACATCGTCAGCTACGGGGCTTTGACA<br/> ACGTCTCACTTCTTGACACTGTTGGCCTGGTTACCGTTTCAACTGCTGGATT<br/> TTACCACGGGCGGTATGTGCTTAGCAGTATCTATGCTGTTTGTGCTCTCGCTG<br/> CCCTGATCTGTTTTGTGATTTCGGTTCGCTAAAACTGCATGAGTTGGCGGTAC<br/> TCCTGCACTAGATATACCAATTTCTCCTCGATACAAAGGGTCGGTTGTACC<br/> GCTGGCGCAGTCCTGTCATAATCGAAAAGGGTGGAAGGTTGAAGTCGAAG<br/> GCCACCTTATTGACCTTAAACGCGTTGTCTTGACGGCAGTGTTGCAACTCC<br/> ACTGACACGGGTTTCTGCAGAACAGTGGGGCCGCCCTAAGCTAGCAGATC<br/> TTTTT</p> |
| <p>PRRSV-2 (MN30100)<br/> Accession# ABU87642.1</p>   | <p>TATCACATGCACCGGTTGGGTAGATGTCTGACCGCGGGCTACTGCTCACGG<br/> CTTTTGAGTCTGTGGTGTATAGTCCCTTTTGGTTTCGCTGTCCTTGTTGAATGCA<br/> AATTCTACCTCCAGCTCACATTTTCAAGTTGATTACAACCTCACTCTGTGCGA<br/> GCTCAATGGTACAGACTGGCTCGCCGGTAAATTTCGATTGGGCAGTTGAAGCT<br/> TTCGTGATTTTCCGGTCTTGACTCACATAGTTTCTTATGGAGCTCTCACTACG<br/> TCTCATTTTCTGGATACGGTTGGTCTGGTGACAGTCTCAACGGCTGGCTTCTG<br/> TCATGGAAGGTACGTGTTGAGCTCCGCTATGCTGTTTGGCGCTTGGCGGCCC<br/> TGATTTGCTTTGTCATAAGATTTCGCTAAGAATTGTATGTCCTGGCGGTATTCT<br/> TGCACCCGCTATACCAATTTCTCCTCGATACAAAGGGCAGGCTGTATCGCT</p>                                                                                                                                                                                 |

|                                             |                                                                                                                                                                                                                                                                                                                                                                                                                                                                                                                                                                                                                                                                                                                                |
|---------------------------------------------|--------------------------------------------------------------------------------------------------------------------------------------------------------------------------------------------------------------------------------------------------------------------------------------------------------------------------------------------------------------------------------------------------------------------------------------------------------------------------------------------------------------------------------------------------------------------------------------------------------------------------------------------------------------------------------------------------------------------------------|
|                                             | GGAGAAGCCCTGTTATTATCGAAAAGGGCGGGAAGGTGGAAGTCGAGGGA<br>CATTGATCGACTTGAAGCGCGTGGTCCTCGACGGCAGCGTGGCGACTCCCC<br>TCACAAGGGTGTCCGCAGAACAAATGGGGACGCCCC <u>TGAG</u> CTAGCAGATCTT<br>TTT                                                                                                                                                                                                                                                                                                                                                                                                                                                                                                                                              |
| Lopma virus<br>Accession# QYL35076.1        | TGACTACGCG <u>ACCGGT</u> ACCTGCTCTAAAAGCTGGGCACCCTGCAGTATGCG<br>GTTTCGTGTCTTTGCTTTCCGTCTTGTTTTTTGCACCATTACACAACGGAGGC<br>GTCTAATACTACGCTTGCAACCATTACAACCTCACGTTGTGCCAATTTAATG<br>TGACGGATGTCTTAACCATTTCGATTATGTCATCGAAGGTGCACTTATTTAC<br>CCTCTTGACCCATGCAATTAGCCATTACTTTCTTACCACAGCGTATTTCCCTT<br>GATTTCCGCGCCTTTGGCTGCTATAAGTATCGCTGCAATATACCAGAAGTTGT<br>ATGTCCTGGGCGCGATCCACGCCTTTATGGCGATTGTTGCTCTGATTTTGCTTT<br>GTCGCAGAGTGATACTTAATATCCTGGCACTCCGGTATGCTTGACGCGCCA<br>TACCAATTTCAATTTGGACACCAAAGGATCTGTCCATCTGAACAAATCCCCT<br>GTGTTGATTTAGACACGTTTGGTGTTAGACTCAACAACGCACACATCCAGC<br>CAAAAATAGTCGTCTTTGACGGTATTAAGGCTCACCTGTGAACACAAGCCA<br>GGCTGAAGAGTGGGCAGCTTAAGCTAGCAGATCTTTTT                                       |
| RtMruf arterivirus<br>Accession# ALI16783.1 | TGACTACGCG <u>ACCGGT</u> AGACCGTCCTGTTTGTGTTTGGTTGTCACCTCTGTTCA<br>TAGGATGGTCATGTCCCGTTTCAGTGGCGGCGAATAGTAATTCAAGTAGCAC<br>TCTCCAATCATTACAAATATGACCCTGTGTGAACTCAATGGGACAGATTTTC<br>CTTGCGAACAAGTTTGACTGGGCGGTTGAGAGTTTCGTGCTTTTCCCAGTGTT<br>TACACATATTGTCTCTAGAGGGTTTATGACAACGAGCCACCTCCTGGACACC<br>ATAGGACTCGCAACCGTTACTATCTCTGGGTACTGGCATCAGAGATATGTCC<br>TTAGTAGTATTTACGCTGTTTGTGCATTCGCCGCGTTTTGCTGTTTTCTTGTC<br>GAGTTATTAAGAACTGTATGTCATGGCGGTACTCATGCACCAGGTTACAAAA<br>CTTTATTCTCGACACTAAAGGACACTTGTTTCAGATGGAAGAGCCCCATACTG<br>GTTGAGAGGGCTGGTAAGGTCGAGGTCGATGGACACCTTATTGATGTTAAGC<br>ACGTGATAATTGAGGGGACTAAAGCCAAACCCGTGACCAGAGTTCCCGCCG<br>AACAGTGGGGTAGTGCA <u>TGAG</u> CTAGCAGATCTTTTT                             |
| RtEi arterivirus<br>Accession# ATP66641.1   | TGACTACGCG <u>ACCGGT</u> AAATGTTATAGATCCTCAGCTGCGTCTGTTATGCGG<br>GCATTCTACTGGTGTCTGCCCTTCTTTCTCTACATAGGCTGGTGTGCCCCGTGC<br>GCTTCCGCTTCTAATGGCACAGGCTCCACCATGCAGCTTATATATAACATGA<br>CACTTTGCGAACTGAACGGAACGGATTGGTTGGTCGATAAATTCGACTGGGC<br>AGTGGAGAGCTTTGTCTTGTTCGGGTGTTTACTCACATTGTGAGTAGAGGAT<br>TCATGACCACCTCACATTTGCTGGATTGGATTGCACTCACAACCATTGCTACT<br>GCCGGTTATTATCATTCCCGGTACGTGCTCAGCTCAATTTATGCGGTGTGTGC<br>TTTCGCTGCCCTTGTCTGTTTTCTTGTCGCTTTATCAAAAACATGCTGCTTG<br>GAGATATAGCTGTACGAGGTACACAACTTTATCCTCGATACCAAGGGAAG<br>ACTGTTTAGGTGGAACAGTCCAATCATCATTGAGAAACAAGGTAAGGCTGA<br>TGTGGACGGGCAACTCGTCGACATCAAACACGTTGTTATTCAAGGAACGAA<br>GGCGAAACCGCTTACGCGCGTCGCAGCAGAGCAGTGGGGCTCAGGTT <u>GAGC</u><br>TAGCAGATCTTTTT |



|                                                      |                                                                                                                                                                                                                                                                                                                                                                                                                                                                                                                                                                                                                                                                                                                                                                      |
|------------------------------------------------------|----------------------------------------------------------------------------------------------------------------------------------------------------------------------------------------------------------------------------------------------------------------------------------------------------------------------------------------------------------------------------------------------------------------------------------------------------------------------------------------------------------------------------------------------------------------------------------------------------------------------------------------------------------------------------------------------------------------------------------------------------------------------|
| LDV (Isolate p)<br>Accession# WKR37874.1             | TGACTACGCG <u>ACCGGT</u> AAGTGCCTCAAGAAGCTGGGGAGCGGTTGGATTCC<br>ATCTCGCCTTCTCCCCTTCTGTTTCATTCTCTATTTTCTGAGTACTGAGAACGC<br>CTGCCGCGGTGGTAACTCATCTACTAAGAATCTGATATATAACTTGACCCTC<br>TGTGAACTTAATGTTACAGGATTTCAACAACATTTTGGATATGCCGTTGAAA<br>CCTTCGTGATTTTTCCCGCGTTGACGCATCTTATTTCTCTCAACTTTCTCACGA<br>CTGCTCACCTCTTGGATTTCCCTTCCCTTGAATAGTGGCCGGTGGCGGCTAC<br>TGGCATAAGCAATATGTCATCTCCAGTATCTACGCCTCTTGTGCCCTTTTGGC<br>ATTCATATTTTTCTGCTGTAGGGCCGTTAGAAATTGTATGTCCTGGAGATACA<br>AGTGTACGCGGTTTACCAACTTCGTGTTGGACACAAAAGGAAAGGTCTACA<br>GAAATCGGTCTCCAGTGCTTGTGAGCAGCACGGACGGGTTATGTTGCAAGG<br>TCACCCAATCGAGGTCAAGACCGTGGTGTGGATGGGGTCAAAGCAGTCCG<br>GGCAAAAACGTGTTCCAGCCGAGAAATGGGAGGCT <u>TAG</u> GCTAGCAGATCTTT<br>TT                                                |
| LDV (Neuro-virulent type C)<br>Accession# AAA74108.1 | TGACTACGCG <u>ACCGGT</u> GGGGATGGGTATAATTTGGGGTTCGGACGGTTCGTC<br>GGTATCATGACGTGCCTCAACAGGCTCGGGGGTTTTCTCATTCTAGCTGGTT<br>GCTGCCATATTATTTTGTCTTTACATTTTGTCCACAGAGAATGCCTGTGTGG<br>CAGGGGATTCTCCACGAAGAACCTGATATATACTAGCACACTCTGTGAACT<br>GAATGTTACCGGATTCCAACAGCATTTTCGGGTACGCCGTTGAAACATTTGTC<br>ATTTTCCCTGCGGTTACACATCTCATATCTTTGAAGTTCCTTACAACAGCACA<br>CCTGCTGGATTTCCCTTTCATTGGGGGTCTGTGGCGGGTGGAGGCTATTGGCATC<br>AGCAATACGTTGTGTCCAGCATTTACGCGTCTGCGCATTTGTTGGCTTTCATC<br>TTTTTTTGCTGTGCGGGCTGTCAGAAATTGCATGAGTTGGAGATATAAGTGTAC<br>TCGGTTTACGAATTTTGTCTCGACACCAAGGGCAGGGTGTTCGGAATAGA<br>TCATCTGTTCTCGTTGAACAGCATGGAAAAGTTCTCCTCCAGGGACAACCCA<br>TAGAAGTGAAAACGGTCTGTGCTCGACGGCGTTAAGGCCGTGCGGGCGAAAA<br>CGGTCCCCGCTGAAAAGTGGGAGGCT <u>TAG</u> GCTAGCAGATCTTTTT |
| RtClon arterivirus<br>Accession# APT40626.1          | TGACTACGCG <u>ACCGGT</u> CCAGCGTGTGTAGCTATCTCCTTTTCTTCCTGTTTCA<br>TGTTTGGTCTTGTCCAGCAACCGTCGCAGGAAGTGGCAACAGTTCCTCTACC<br>TTGCAAAGCATATACAATCTCACCGTTTGCGAATTGAATGGAACGCAGTGGC<br>TTGCGACTCACTTCAGCTGGGCCGCGGAGACCTTCGTGCTTTACCCCGTCATT<br>ACTCATATAATTAGCCGCGGTTTTATGACAACGAGTCACCTTCTGGACGCGA<br>TTGGTCTTGTGCGAGTGGCGGCTAGTGGGTATCATCACGGACGGTATGTGCT<br>CAGCTCCGTCTATGCTGTCTGCGCATCTGCTGCTTTTCGTGTGCTTTGTGGTTCC<br>CATGGTTAAGAATTGTATGTCCTGGCGCTATAGCTGTACACGCTATACAAAT<br>TATATTTTGGATACAAAGGGTAGAGTCCACAGGTGGCACAGCCCCGTTCTGG<br>TGGAGCGGCAAGGGAAGATTGATGTGAATGGGGATCTTATCGACCCGAAAC<br>ACGTCGTGATAGAGGGAGTGAAAGCTCAGCCAGTCGTTAGGGTTCCCGCCG<br>AACAATGGGGGCCTCGCT <u>TAG</u> GCTAGCAGATCTTTTT                                                                   |
| MgAV1<br>Accession# QHD57634.1                       | TGACTACGCG <u>ACCGGT</u> GGCCACAGGCGCAACCTGTGTCACTGCCGCGCCTG<br>CAGTGTGGTTACAATGAAATGCTGGTCAAAGTCTGCGGAGCCTCTTACACGG<br>GCATGCTGCCTGTGGCTTTGCTCACTCCTTTTTATAGGCTGGTTCTGTCCAGGT                                                                                                                                                                                                                                                                                                                                                                                                                                                                                                                                                                                       |

|                                                |                                                                                                                                                                                                                                                                                                                                                                                                                                                                                                                                                                                                                                                                                                                                                                                                                                                                                                                                                                                               |
|------------------------------------------------|-----------------------------------------------------------------------------------------------------------------------------------------------------------------------------------------------------------------------------------------------------------------------------------------------------------------------------------------------------------------------------------------------------------------------------------------------------------------------------------------------------------------------------------------------------------------------------------------------------------------------------------------------------------------------------------------------------------------------------------------------------------------------------------------------------------------------------------------------------------------------------------------------------------------------------------------------------------------------------------------------|
|                                                | <p>TCAGTCGCGGCTGATGGGAACATCAAGTACGCTTCAACTGATTTATAATC<br/> TTACCCTCTGTGAGTTGAACGGTACTGATTGGTTGGCAAACAAGTTCGATTG<br/> GGCCGTCGAGTCTTTTGTCTTTTCCAGTGTTACGCGATATCGTCAGCCAGG<br/> GATTCTGACTACGTCCCATCTTCTTGACACCATTGGATTGGCTACAGTGGCA<br/> ATCTCCGGGTACTGGCATTCCAGATACGTGCTTTCATCAATCTACGCGGTCTG<br/> CTCCTTTGCCGCTTTGTCTGTTTTTTGATTTCGATTGTTAAAAATTGTATGTC<br/> ATGGCGGTACTCCTGCACCCGCTTCACCTCATACATACTGGATACAAAGGT<br/> CGGCTCTTTAGGTGGAAGTCACCCATATTGATAGAGCAGGCTGGGAAAGTC<br/> GCGGTTGACGGCCACCAGATCGACGTCAAACACGTTATTATTGAGGGAAC<br/> AAGGCCAAGCCTATCACGCGCGTGCCTGCTGAGCAGTGGGGACTTGCGTAA<br/> GCTAGCAGATCTTTTT</p>                                                                                                                                                                                                                                                                                                                                                                         |
| SHFV (LVR 42-0/M6941)<br>Accession# AIL48195.1 | <p>TGACTACGCGACCGGTATCTCTGTCTTGGAAGATCCGAAACGCCCTTATA<br/> GGTCTGTTCCGCACCAGTTCACATCCATATCATGGTTTTATGTCCTGTTTTT<br/> GTTTCTATCACATTTAGTTCCACGGGTGCGAGCGAAAATAATACGGGTACGA<br/> CATGGATTAGCATATCAAAGTTTCCATCTCTTCTGTTGTCTCAGATCATTTC<br/> CCATCATATATTGTCAATATCAGTGTCTGCGGAGCGTTCGACATACAGAACA<br/> ACACCCACTGGTTTACGCCGTGCAACCTCAGTGTGCTCAATCACTCTGACTG<br/> CCATACCTGTAAATCTGAACAGTCTAACCAAAGTCTCCTTTCCAATTGCAGT<br/> ACGTGTTTCACGCACTTGTCTTCTGTTTTTGCATACATACACAGGACATCA<br/> TATAACAATACTAGGCTGCTGTTGGAAACATATCTCGCTGTCCCCCTGCTC<br/> ACTCACCTCCTTTCTTACAAGTTTGCTACAACAGCGTCTTTCTTGACTTTGC<br/> GTTCTTCGCTGGGCTTTCAATTACTGCCTATCGCTACGTGAGTCCCGCGATAC<br/> TCTTTTTTCTCCCGCTGGCACTGATATTTTCAGCAATATTTATTAAAAACTG<br/> GTTGTGAACTGCATGGCTCTTCGGTTTGCGTGGACAAGGCATACTAATTCAT<br/> TATTGATGACCGCGGACGCCTCTTCGTCAACCACGATGATGTGCTCATTTCC<br/> GATCCTCAAGGCCTCCGGGTGCGGCCGCATAAGGTGCGGGCGGCCAAAGTT<br/> ATCCTGGGTGGAAGGGAGGCCAACCTGTTGCGCCAAGCCCATGTTGAAGAG<br/> TGGTCTGTTAAGCTAGCAGATCTTTTT</p> |
| SHFV (B11661)<br>Accession# AIY55127.1         | <p>TGACTACGCGACCGGTACTTGTGCTTGGGTGCGTCTGAGACTTCCCTGATTG<br/> GTCTTTTCCGCACCAGTCCACTTCTATCTCATGGTTCTACGTGCTTTTCTTCG<br/> TTTCTATCACATTCAGTCTACAGGCGCATCAGAGAATAACACCGGCACCAC<br/> GTGGATTTCTATTTCAAATTCCTTCACTGTTGTTGTCCCAAATCATCTCTCC<br/> ATCCTATATAGTGAATATAAGCGTCTGTGGTGCTTTTGATATACAGAACAAC<br/> ACTCATTGGTTTACACCCTGTAACCTGTGCTAGTCTCAACCACTCCGATTGCCA<br/> TACTTGCAAATCAGAACAGAGCAATCAGAGTCTGCTGAGTAACTGCTCTAC<br/> ATGCTTCACGCATCTCTCAAGTTGCTTTTTGCACACTTATACCGGGCACCACA<br/> TAAATAACACGCGCCTTTTGCTCGAAACCTACCTCGCCGTGCCTTTGCTTACG<br/> CACTTGCTTAGCTACAAATTTGCGACTACGGCTAGTTTTTTGGATTTTCGCTTTC<br/> TTCGAGGGCTCTCCATTACTGCGTATAGGTATGTCAGCCCGGCGATCCTGTT<br/> TTTCTTGCCATTGGCCCTGATCTTTAGCGCCATTTTCATAAAAAAACTGGTTG<br/> TGAATTGTATGGCTCTCCGTTTCGCTGGACCAGACACACGAACCTTTATAAT</p>                                                                                                                                                                                                    |

|                                                                |                                                                                                                                                                                                                                                                                                                                                                                                                                                                                                                                                                                                                                                                                                                                                                                                                                                                      |
|----------------------------------------------------------------|----------------------------------------------------------------------------------------------------------------------------------------------------------------------------------------------------------------------------------------------------------------------------------------------------------------------------------------------------------------------------------------------------------------------------------------------------------------------------------------------------------------------------------------------------------------------------------------------------------------------------------------------------------------------------------------------------------------------------------------------------------------------------------------------------------------------------------------------------------------------|
|                                                                | CGATGATCGGGGGCGCCTGTTTGTCAATCATGACGATGTTTTGATAAGCGAT<br>CCACAGGGACTTCGGGTGGGGCCGCACAAGGTTAGGGCTGCGAAAGTTATA<br>CTGGGAGGGAGAGAGAGGCAAATCTGTTGAGACAGGCTCACGTGAGGAGTG<br>GAGTTGGT <u>GAG</u> CTAGCAGATCTTTTT                                                                                                                                                                                                                                                                                                                                                                                                                                                                                                                                                                                                                                                            |
| Free State vervet virus<br>Accession# YP_009249819<br>.1       | TGACTACGCG <u>ACCGG</u> TCTCAGCGCTTCTCTCTTGTCTGTGTTCTTTTTATGCT<br>CCAAGTGCGGTGCTCAACGTCAGCAGCCTCAAATGTTTCACTCTTTTCCAAC<br>CCGTCAGGCTTCATTCAGGCACTGCAAAAGACCCTGATCTCTGATTCTCTACG<br>TGGTCAACATCAGTATCTGCGGTGCCCTGTCTATTCAGAACAAATACACATTG<br>GTTCCAAGACCTCAGCACTTGTAACCATACGGGGGCCAACACGAAACACG<br>CAACAAGACCGACAGTTTTCCCGTCACCTGCTTGATCCATAACTATACAGGG<br>GTTAACATCAATCACACACGCCTCGCTCTCGAGACCTATCTCGCGGTGCCTT<br>TGGCCACATATTTCTGTCATTTTATGCAGCTACCACCGCAGCTTTTTCTTGAC<br>TTCCTGTTCTGGCTTGGCCTTGGGTTGACGGCTGCTCATTATGCCTCCCCAGC<br>AGTTATTATTTACGCTCCCTTGGCGTTGATCTTCTTGGTGGTGTTCCTTAAAG<br>AGTCATAATTAAGTGCCTTGCTCTGAGGTATGCATGGACCAGACATACTAAT<br>TTCATAATAGATCAAAGCGGTGCGTTGTTGTTAATCACGATGATTGTCTGAT<br>AGAACGGAATGGAAAAACCGTGCTCAACAACCAAGAGGTGAAAGTGGGAA<br>AGGTGATCCTCGGGGGACGGCTTGCTCATGGGATTAAAGCGACTCATGTTGA<br>GGAGTGGGGCTGGT <u>GAG</u> CTAGCAGATCTTTTT |
| Zambian malbrouck virus<br>Accession# ANB32510.1               | TGACTACGCG <u>ACCGG</u> TCTCCACGCCTCACTCCTCTCATGTGTTTTGCTCACGT<br>TGCTTATTCAATTCTCAAACGGAGCCAATTCCAATACATCCCTCTTCTCCTCT<br>CCGGCGGGGTTTATTTAGCACTCCAGCAGACCTTGATCTCTGACTCCTATAT<br>CGTCAATATAAGCATCTGCGGTGCACTGGACATTGAGAACCAAGACTCACTG<br>GTTCCAGGACTTCTCTCATTGCAAACCGTTGACAGCTACGAGTAACACAACC<br>ACCTCCTATCCAGTTTCTGTGAAATACAGAATTACACCGGACAGTATATAA<br>ATCATACGAGACTTGCCCTTGAAACCTATCTCGCTGTCCCACTGGCGACGTA<br>CTACTTGAGCTTTTTCTGCTGCTACTACTGCCGCTTTTTCTTGACTTCCTTTTTTG<br>CTCGGCCTCTCCCTTACCGCAGCACACTTTGCTTACCAGCATTCAATTGTTTA<br>CAGTCCTCTTGCAATTGTGTTCTTGGTCGTCTTTCTGAAACGGGCGATAACAA<br>ATTGTCTTGCGCTTAGATATGCCTGGACCAGGCACACTAACTTCATTATCGA<br>CCAGTCTGGTAGGCTGTTTGTGAATCACGATGACTGTCTGATAGAACGCAAT<br>GGAAAGACAGTTATTGGGAATCAAGAGCTTAAGGTGGGAAAGTTATACTG<br>GGAGGGCGGCTGGCGCATGGAATCAAATCAACGCACGTGGAAGAATGGGG<br>ATGGT <u>AAG</u> CTAGCAGATCTTTTT         |
| DeBrazza's monkey arterivirus<br>Accession# YP_009121781<br>.1 | TGACTACGCG <u>ACCGG</u> TAAATGCTATGTTCCGAGTGAAAGGAGTAGTACCGG<br>GACTCACATTACGAGCGCGCTTAGTACGTTTCTTTTGCTCTGTGCCTGCTGTG<br>TGAGCACTTTTAAAACTGCAAGTGCCACCGATGTTGGGGGGTTTAGTAGTAA<br>CAGCACATTGTGGAGCTCTTTCAAAAATCATATCATTAGTGATTCTTATGTCG<br>TCAACATTAGTATATGCGGCGCCCTTGATATATCTAATAACACGCATTGGCT<br>GACGCCTTGCAACTACTCTCAGTTTAAGCAAGATTGTCTCGATGGAAATGGG<br>ACATTTAAGAAGAACGAGAATAAGTGTAACCACTCCTCCTGCTTTCTTCAGC                                                                                                                                                                                                                                                                                                                                                                                                                                                       |

|                                                                               |                                                                                                                                                                                                                                                                                                                                                                                                                                                                                                                                                                                                                                                                                                                                                                                                                                                                                                                                                  |
|-------------------------------------------------------------------------------|--------------------------------------------------------------------------------------------------------------------------------------------------------------------------------------------------------------------------------------------------------------------------------------------------------------------------------------------------------------------------------------------------------------------------------------------------------------------------------------------------------------------------------------------------------------------------------------------------------------------------------------------------------------------------------------------------------------------------------------------------------------------------------------------------------------------------------------------------------------------------------------------------------------------------------------------------|
|                                                                               | <p>ACTACACCGGGCAGAACATTAACCTACACTCGGGTGATTCTCGAAACGTATTT<br/> GGCGACACCGTTGTTTACGCATCTCCTGTCCTACTATGCTGCGACTACGGCC<br/> GCCGGGCTTGACTTTCTGTACTTCGCGGGCCTGGCTCTGACCGCTGTCTATTA<br/> TCAAAGTCCAGCATTCTTGACGTTTAGCCCGCTCGCTCTCATTTTCTGGTTGT<br/> CTTTGTCAGACGGTTGGTCCTTAATTGTATGGCGCTGAGATACGCATGGACC<br/> CGGCACACAACTTCATCATAGATCAGAATGGAAGGCTCTTTGTTAACCACG<br/> ATGACGTTCTCATAGCCGATAAAGATGGAGTGAAAGTTGGGAGTCAGAAAG<br/> TGAAAGTCGCTAAGGTGATACTCGGGGGACGGGAAGCCTGCCTTCTTAGAC<br/> AGGCACACGTCGAGGAGTGGACATGGT<u>AGG</u>CTAGCAGATCTTTTT</p>                                                                                                                                                                                                                                                                                                                                                                                                      |
| <p>Pebjah virus<br/> Accession# AKI29935.1</p>                                | <p>TGACTACGCG<u>ACCGG</u>TACATATCAGTCCTCTTGAGCTTGACCTTGCTTTTGT<br/> CCTCTACCGTCACAAGATGCGTGTCTTCTGATGGCGATGTGAAGTCTTATGC<br/> GCCCTCAAGTTGGATGAGCAAAGTTAAAGAGATGATTCTGGAACCAAGCTA<br/> CGTTGTCAACATTTCCATTTGCGGAGCGTTTGATATTCAGAATAATACCCACT<br/> GGTTCAGACCATGCGACAGTTTTAAACAAAATATCACAGGCAACTGTAATA<br/> ACGAGACCGCTAGATGCTCCGCCTTCCTCAACAACCTTCCATGTATGCTGCA<br/> CAATTACACTGGATCTCATATAAACCATACTCAGGTCCTTCTCGAAACCTAC<br/> TTGGCGGTTCCGTTGTTGACTCATTTGCTCTCTTACTACGCGGCGACCACTGC<br/> AAGTTTCCCTCGATTTACATTCTTTGGTATGCTTGAGGTTCTGCATACTACTA<br/> CTTCTCTCCCTCTTTTTTTTTTTTTCGCTCCCTCGCACTCATCTTCTGTGTATAT<br/> TTCTGAGGCGGATCATAACTAAGTGTATGGCTCTTCGGTATGCGTGGACGCG<br/> CCATACCAATTTTATAATAGATCAGAAGGGCCGGTTGTTGTCGAATCACGAC<br/> GATGTTCTTGTGAGCGATCAAGGCCAAGTGAAATTGGGAGATCATCGGGTTG<br/> TTGTTGCCAAAGTCATTCTCGGTGGAAGGGAAGCCCAACTTCTCCGGGAAAG<br/> TCATGTGGAAGAATGGGCATGGT<u>GAG</u>CTAGCAGATCTTTTT</p>                                   |
| <p>Mikumi yellow baboon<br/> virus 1<br/> Accession# YP_009067059<br/> .1</p> | <p>TGACTACGCG<u>ACCGG</u>TAAACAAGTGCTATAGAAATTGGGAGCCGTTCTCCATG<br/> CCATCACCGTCCACACTCAGCCTTTGCACCTTTCTGCTGCTTTTGACATCTTCT<br/> TTGTCAGACATGGCGGATAATGCCACTTCTCATGATCCAGTCACCGTCTGGT<br/> CCGACATATTCAGCAACCTTATGAGCCCTTCCTATGTTGTGAATATATCTATT<br/> TGCGGGGAGTGTCCATACAGAATGATACACATTGGTACAAACCATGCACA<br/> GCCGCAGAGATTGGTAACGCCACTAAGAACGATGCAAACCTACACCAAGGTG<br/> AGTAGCCTGCCCTGTATCCTGCACTCTTATACAGGAGTGACAGTGAACCATA<br/> CAAAGGTGTTCTTGAGACTTACCTGGCTGTCCCGCTGCTCACACACATGCT<br/> GTCTTACTTCTGCGCTACGACGGCTGCTTTTCTTGATTTCACTTTCTTTGGAGG<br/> CCTTGCGGGGGCGGCATATTATTATCATTCTCCTGCTCTTTTGCTGTACACAC<br/> CCTTGGCCCTTATTTTCTGGTTGTTTTATCCGGCGCTTGACATTGAACATCC<br/> TGGCGTTGAGATTGCGATGGACCCGGCATAACCAATTTTATAATAGACCAGA<br/> AGGGACGGTTGTTTGTGAACCATGACGACGTCTTGATAGAGGGACCAAACG<br/> GTGTCAAACCTGGCTGATAAGGAGGTTCCGGTTCGCAACCGTCGTCCTGGGGG<br/> GCCGCAAGGCACATCTTCTCCGCAGCGCCCATGCAGAAGAATGGTCCTGGT<br/> <u>AGG</u>CTAGCAGATCTTTTT</p> |



|                                                                  |                                                                                                                                                                                                                                                                                                                                                                                                                                                                                                                                                                                                                                                                                                                                                                                                                                           |
|------------------------------------------------------------------|-------------------------------------------------------------------------------------------------------------------------------------------------------------------------------------------------------------------------------------------------------------------------------------------------------------------------------------------------------------------------------------------------------------------------------------------------------------------------------------------------------------------------------------------------------------------------------------------------------------------------------------------------------------------------------------------------------------------------------------------------------------------------------------------------------------------------------------------|
| <p>African pouched rat arterivirus<br/>Accession# AJG06163.1</p> | <p>TGACTACGCG<u>ACCGGT</u>GCCGTCCCGTATTGCCATGCAGTTGGAGACCACAAT<br/>CTTATGCGCGATAGGAATACACCTTGTTCAATGATTTGCTTGCGGGGGACGC<br/>GGTACCTGAGTTCCATGCTCAGTAGTCTGCAATGGGTCGTTTTCTGCGTGATC<br/>TGC GTTTGCTGTGCCAGCTCTGGGGTGGCAGCTTCTGGAAACCTCACGTCTGT<br/>TACGCATACTTGGA CT CATAATTTGACACTCTGTGCGTTGAATAACACAGAG<br/>AATGCGACAAAACGCTTCCAACATGTTGTGGAGGCATTTCGCGGTGTCCCTC<br/>TGGTGACACATGTGGTGTCA TTGTTTTCTTCACAACCGCGAGCTTCCTGGAT<br/>GCCGCCGCCTTTGGTCTTGCTTCATGGTATACCTTCCAAGGCGATGCTATTGT<br/>GCTTTGTGGGTTGTATGGGCTCTGCGGAGCAATAGCTCTGTTTCATCGCCAGTT<br/>GGCGGGCTGTCTTGA ACTGCCTCGCCTTTAGGTATGCCTGTACGCGGCGCAC<br/>AAACTTCCTCTTGACTGACAAAGGGGCGGTGTGCCATTGCAAGAGCGGTA<br/>CGTGGTGATGCAGGGAAGCCAGGCTGTTCTTCCTGGGGGTCAAAAAGTTACC<br/>CCGAAAGCTGTTATTCTTGAGGGGCGGGAGGCCAAGTCACTTAACAGTATTA<br/>CGGCTGAACACTGGAGCCCC<u>TGAG</u>CTAGCAGATCTTTTT</p> |
| <p>Hedgehog arterivirus<br/>Accession# QRL06414.1</p>            | <p>TGACTACGCG<u>ACCGGT</u>TGTTTGAAATGTTTGCTGGGGTTGCCCCACACGTTG<br/>ATGAGGGGATTACCAAGTAGCTTCGCAGTGTGGTGTTTTTCAATTCTTTTTAT<br/>TGCGAGTGTCCCCGCCGGGGTCAACGCTACGA ACTATAGGCTT<br/>TTTACAAATCTCACCTGTGCGCGTTGAATGGGAGCAGTAATGCATATTTTA<br/>AGTACCTTTCTGAAGCTGTTTTAGTGCCCCATCCTCAGTCAAATCATCAAC<br/>CAAAAGTTCAAACTACAGCCTCTTTATCGACACAGCCTGTTTTACCATAG<br/>TTGCAGCTTTCCTGTTTGCCGACCATAACCGCACGGCTTCTCGGCAGTATTTAT<br/>GCATGTATTGCTTTGATGGCCTTGAGTA ACTTCGCCTGGAGGTTCTTTAACA<br/>CTGTGCACTTGAGATACGCATGCACACGCTTTACGTCATTTATACTTACG<br/>ACTAAGGGGGCCGTTATCCGGTACTCCTACCCGTATCTGCTGCACAAGCAAA<br/>AACAGGTGCTCTTGCTGATGGGACCATGGTTGAACCCAAGCACATTTTGTC<br/>AGGGGGTCGGTTGGTTACATCCGATACGGGTATTGAGGCGGAATTGTGGGC<br/><u>GTAAG</u>CTAGCAGATCTTTTT</p>                                                                                                 |
| <p>Olivier's shrew virus 1<br/>Accession# ASA49508.1</p>         | <p>TGACTACGCG<u>ACCGGT</u>AAATGCCTGAATAATTCCGCTCGGCCGCTGACACTT<br/>TGGTCTGCATTGCCATTCTTTTTCATATTCTTGTTGGTGCGGTGGCGTGCAAGTG<br/>GGGATCGTCGGGGCCAGCAACACAACCTCTCACAGTCTCAAGTATTACTTGA<br/>TCCATAACATCACCTCTGCGAATTGAATACAACCGCGCTGCCCGGGGGTTA<br/>TTCCTTCACCTATGTCGAGGAGTATTGGGTGATCGCGCCATTCA TTGTGCTATA<br/>TTATGGGCTTCACTGCAAAAACACTCAGCCTGTCCTGCGATCTCTTGGTGGTG<br/>GGTCCATTGTTGGGGTTGCCGCCACATGAAAGCTTATTATTTGATGGTTAT<br/>GCTTATTCCA ACTTCTGCCATCCTTCTGGGAGCCTGGCTTTACCAGGTGATTA<br/>TTACCTTCATGACATGGCGGCACGCCTGTACCCGCCACACTTCATTCGTCAG<br/>GAGTAGTGACGGCCAACTGGGAAAAATTA ACTCACATGTGCTGCTTGTA<br/>GGGCGGTAAAGCTCTTACCAACAACGGCTGGGTCAAACCCGACCTTGTGGTT<br/>TTGAAGGGGCGGAAAGCGGTTGAAACACACTCTGTGCCGTGTGACCACTAC<br/>GCATA<u>AG</u>CTAGCAGATCTTTTT</p>                                                                               |

|                                                     |                                                                                                                                                                                                                                                                                                                                                                                                                                                                                                                                                                                                                                                                                                                                                                                                                                                                                                                                 |
|-----------------------------------------------------|---------------------------------------------------------------------------------------------------------------------------------------------------------------------------------------------------------------------------------------------------------------------------------------------------------------------------------------------------------------------------------------------------------------------------------------------------------------------------------------------------------------------------------------------------------------------------------------------------------------------------------------------------------------------------------------------------------------------------------------------------------------------------------------------------------------------------------------------------------------------------------------------------------------------------------|
| <p>EAV (ARVAC)<br/>Accession# ACE82280.1</p>        | <p>TGACTACGCG<u>ACCGG</u>TTTGTCTATGATTGTGCTGCTCTTCCTTTTGTGGGGCG<br/>CACCTTCACATGCCTATTTTTCATATTATACAGCTCAGAGATTCACTGACTTT<br/>ACACTCTGCATGCTGACAGATAGGGGGGTTATAGCTAACTTGCTCAGATACG<br/>ATGAGCACACCGCCCTCTACAACTGTTCCGCGTCCAAGACGTGTTGGTACTG<br/>CACTTTTCCTGACGAAAAAATCATCACGTTCCGGGACTGATTGCGACGATACT<br/>TACGCGGTCCCCGTGGCTGAGGTCCTGGAGCAAGCCCATGGCCCCCTACGGG<br/>GTTCTGTTCCGAGATGTCCCGCCCTTCATATATTACGGAAGAGAATTTGGGA<br/>TTGTCGTCCTGGATGTCTTTATGTTTTATCCGGTGCTGGTGCTCTTCTTCCTCA<br/>GCGTCCTGCCTTACGCGACCTTGATTTTGGAGATGTGCGTCTCCATCCTTTTT<br/>ATTATCTACGGAATCTATTCCGGTGCCTATCTCGCGATGGGAATTTTTTCAGC<br/>TACACTTGCTATACACAGCATAGTGGTGCTGAGGCAGTTGTTGTGGCTTTGTC<br/>TGGCTTGCGGTACCGCTGCACTCTGCACGCATCTTTTATCTCTGCAGAGGGT<br/>AAAGTGTATCCCGTTGATCCCGAGCTGCCTGTTGCTGCAGCAGGGAATCGCC<br/>TCCTCGTGCCCGGTGCGCCCCACCATAGACTATGCAGTGGCGTATGGATCAAA<br/>GGTCAACCTGGTGAGACTCGGAGCGGCGGAAGTTTGGGAGCCCT<u>AGG</u>CTAG<br/>CAGATCTTTTT</p> |
| <p>EAV (F20)<br/>Accession# ABR92874.1</p>          | <p>TGACTACGCG<u>ACCGG</u>TCTCAGCATGATTGTCCTCCTCTTCTTGTCTGTTCTGGGGAG<br/>TGCCCTCTCACGCCTATTTCTCATACTACACAGCCAGCGGTTACCGACTTC<br/>ACCTTGTGTATGTTGACAGATCGCGGCGTGATTGCAAATCTGCTCAGATACG<br/>ATGAGCATACCGCATTGTATAATTGCAGTGCCAGCAAGACCTGCTGGTATTG<br/>CACATTCCTGGATGAGCAAATCATAACATTCGGGACTGGCTGTAACAACAC<br/>ATATTCTGTGCCTGTTAGTACCGTCTTGGAACAAGCGCATGGCCCCTACAGC<br/>ACGCTTTTTGACGACATGCCCCCATTCATTTACTATGGAAGGGAATTTGGTAT<br/>TTTCGTCATGGATGTGTTTCATGTTTTACCCCGTTCTCGTCTCTTTTTCTTGTCC<br/>GTGCTTCCGTACACCACTTTGATCCTTGAAATGTGTGTGAGCATATTGTTGT<br/>CGTCTACGGACTTTACTCTGGGGCGTATCTTGCCATGGGTATTTTTGCTACTA<br/>CGTTGGTGGTCCATTCAATAGTGGTGTTGCGCCAACCTTCTCTGGTTGTGCATG<br/>GCCTGGCGGTATCGGTGTACCCTTCATGCCAGTTTCATTAGCGCGGAAGGCA<br/>AAGTCTATCCAGTCGATCCAGGGCTTCCTATCGCGACACTCGGAAATCGCTT<br/>GTTGGTGCCTGGGCGGCCAACGATCGATTATGCGGTGGCGTATGGGTCTAAA<br/>GTTAACCTTGTCAGACTTGCGCGTCTGAAGTGTGGGAACCC<u>TGAG</u>CTAGCA<br/>GATCTTTTT</p>  |
| <p>EAV (GB_Glos_2012)<br/>Accession# BAQ56335.1</p> | <p>TGACTACGCG<u>ACCGG</u>TCTCTTTATGATAGTGCTCCTGCTCTCATTCTGGGGAG<br/>TTCCATCTCATGCCTACTTCTCATACTACACGGCACAGCGCTTTACAGATTTT<br/>ACTCTCTGTATGTTGACGGATAGAGGTGTCATAGCCAACTTGCTCAGATATG<br/>ACGAGCACACAGCGTTGTATAATTGCAGTGCGTCCGCCGATTGTTGGTATTG<br/>CACGTTTCTCGACGAACAAATCATTACTTTCCGTACCGGGTGAATGACACG<br/>TACAGTGTCCCAGTCAGCGTTGTCCTCGAACAAGCGCACGGCCCATACAGC<br/>GTCCTGTTTGACGATATGCCCCCTTTCAATTTATTATGGGAGGGAATTTGGTAT<br/>TTTTGTGATGGACGTTTTTCATGTTCTACCCAGTTTGGTGCTGTTTTCTTTCT<br/>GTTTTGCCTTACGCTACATTGGTCCTGGAATGTGCGTTTCAATCCTCTTTGTG</p>                                                                                                                                                                                                                                                                                                                                                                                  |

|                                                                              |                                                                                                                                                                                                                                                                                                                                                                                                                                                                                                                                                                                                                                                                                                                                                                                                                                                                                                                  |
|------------------------------------------------------------------------------|------------------------------------------------------------------------------------------------------------------------------------------------------------------------------------------------------------------------------------------------------------------------------------------------------------------------------------------------------------------------------------------------------------------------------------------------------------------------------------------------------------------------------------------------------------------------------------------------------------------------------------------------------------------------------------------------------------------------------------------------------------------------------------------------------------------------------------------------------------------------------------------------------------------|
|                                                                              | <p>ATTTACGGGATCTATTCTGGGGCTTATTTGGCTATGGGCGTGTGTTGCTGCCAC<br/> CCTGGTCGTTACAGTGTGGTGGTTCTCAGACAATTGCTCTGGCTCTGTTTGG<br/> CATGGCGGTACCGCTGCACCCCTCATGCGTCTTTTATATCCGCAGAAGGCCG<br/> GGTCTACCCCGTCGACCCCGGTCTGCCTATTGCGACAGCAGGCAACAGGCTG<br/> CTCGTTCCGGGCCCGCCGACTATAGACTATGCGGTTCGCATACGGTAGCAAG<br/> GTGAATTTGGTGAGACTCGGCGCGGCGGAGGTTTGGGAGCCTTAAGCTAGC<br/> AGATCTTTTT</p>                                                                                                                                                                                                                                                                                                                                                                                                                                                                                                                                   |
| <p>Wobbly possum disease<br/> virus<br/> Accession# YP_009130637<br/> .1</p> | <p>TGACTACGCGACCGGTAAGGCGCTGATTGACCTCACGTACGCCAACCTGAC<br/> GATGGAAGTGGGTCACCAGATCAACGTGAGAGAGGAGAATGGCACGTACG<br/> CGCAGGCCGCGGCGCTGCTCTTTGCCAGCATCGCCTCAATGCCTCACTTCAC<br/> GCTTGGTTCTACCCGGTCAAGCGGGTCAGTGTCTTTATCACCATAATAAG<br/> ACCGACCACTGCTTCGGGGTCAGGCTTCACATCGCTACACACTTTTGTAAAC<br/> AGACGAAACTTGAGGTCAATTGCATAAATGACTACCTCCACACATGCCAAA<br/> TCCCTCTTTGTGCGCATGGTAACCTTCTCTGCGTTCACCCCATGTGAGGTGT<br/> AATCCGTGGTTTGCTAGAACTTCTTTTTCGATATGTACTTGCGCTCACTGGC<br/> TCTTTCTGACAAGCAACGGTACCACAAGTATTTGGACTATCACGCGCACTTG<br/> TCCTTTGCTGCCCCCATCACTTGTCTTATACTCACAACCTTATGTGATCTTCACA<br/> CTGATGGCTCGGGTGAGAATCTCTGGCTAAGCTAGCAGATCTTTTT</p>                                                                                                                                                                                                                                                           |
| <p>EAV (PLD76)<br/> Accession# AAA92913.1</p>                                | <p>TATCACATGCACCGGTTGTCTATGATTGTTCTGTTGTTCTTGCTGTGGGGAG<br/> CTCCAAGCCACGCCTACTTCTCATATTATACGGCGCAGAGATTACTGATTTT<br/> ACTTTGTGCATGCTGACCGATCGGGGCGTTATCGCTAACCTCTTGCGGTATG<br/> ACGAACATACGGCACTCTATAATTGTTCTGCGAGCAAGACATGCTGGTATTG<br/> CACTTTTCCCGATGAGCAAATAACTACTTTTGGGACAGATTGCGATGACACT<br/> TATGCGGTTCCCGTGGCTGAAGTGTTGGAACAGGCCACGGCCCATACGGTG<br/> TGTTGTTTGGAGATATGCCCCCTTTTATATACTATGGCAGGGAGTTTGGTATT<br/> GTTGTTATGGACGTGTTTCTATCCAGTTCTGGTCCTTTTCTTTCTGAGC<br/> GTCCTTCCGTATGCGACTCTCATTTTGGAAATGTGCGTTAGCATTTTGTATT<br/> ATATATGGGATCTACTCCGGGGCTTACCTTGCTATGGGGATTTTAGCGCTAC<br/> CCTCGGATACATAGCATAGTCGTTCTTAGGCAACTTTTGTGGCTTTGTCTTG<br/> CTTGCGGTATAGGTGCACTCTCCATGCCTCCTTCATATCTGCGGAAGGGAA<br/> GGTTTACCCCGTCGACCCAGGGCTCCAGTCGCAGCCGCTGGGAATAGGCTC<br/> CTCGTTCCAGGTCGGCCTACCATTGATTACGCGGTGGCTTATGGTTCCAAAGT<br/> GAACTTGTTTCGGTTGGGCGCTGCGGAGGTTTGGGAACCGTAAGCTAGCAG<br/> ATCTTTTT</p> |

2

3



**Supplementary Table S2. Synthesized DNA for generating plasmids encoding pig TRIF protein**

4

|                                                         |                                                                                                                                                                                                                                                                                                                                                                                                                                                                                                                                                                                                                                                                                                                                                                                                                                                                                                                                                                                                                                                                                                                                                                                                                                                                                                                                                                                                                                                                                                                                                                                                                                                                                                                                                                                                                                                                                                                                                                                                                                                                                                                                                                                                                                                                                                                                                                                                                                                                                                                                                                                                                        |
|---------------------------------------------------------|------------------------------------------------------------------------------------------------------------------------------------------------------------------------------------------------------------------------------------------------------------------------------------------------------------------------------------------------------------------------------------------------------------------------------------------------------------------------------------------------------------------------------------------------------------------------------------------------------------------------------------------------------------------------------------------------------------------------------------------------------------------------------------------------------------------------------------------------------------------------------------------------------------------------------------------------------------------------------------------------------------------------------------------------------------------------------------------------------------------------------------------------------------------------------------------------------------------------------------------------------------------------------------------------------------------------------------------------------------------------------------------------------------------------------------------------------------------------------------------------------------------------------------------------------------------------------------------------------------------------------------------------------------------------------------------------------------------------------------------------------------------------------------------------------------------------------------------------------------------------------------------------------------------------------------------------------------------------------------------------------------------------------------------------------------------------------------------------------------------------------------------------------------------------------------------------------------------------------------------------------------------------------------------------------------------------------------------------------------------------------------------------------------------------------------------------------------------------------------------------------------------------------------------------------------------------------------------------------------------------|
| <p>pig TRIF</p> <p>Accession#</p> <p>NP_001302667.1</p> | <p>TTTTGGCAAAGAATTCGCCACCATGGCGAATACATCACCTTCTCTGAGCGGGGCATTT</p> <p>AATATACTGTCCGCAGCCGGGCAAGGGAAGCTGTTGTATTTGAAGCACAAGCTCAAA</p> <p>ACACTGAGGCTGGGATGTCAGGGGGCTGACTTGCTGCACGCAATGGTTCTCCTTAAAT</p> <p>TGGGGCAAGAGACAGAGGCACGCATTTCCCTCGAAGCCCTTAAAGCCGACGCTGTTG</p> <p>CTCAGCTCGTCGCGCGGCAATGGGCGGGCGTGGATAGTACTGAGACGCCTGAAGAGC</p> <p>CCGCAGATGTTAGTTGGGCGGTTCGCACGCGTCTACCACCTCTTGGTCGAGGAGAACT</p> <p>TTGTCCAGCCTCAATGCGGGAGGAAGCTTATGGCGCAGCACTCCGGGCCTTCAGGAG</p> <p>TCGGGATGATCACCAGCTCGGAGAGTTGCAGGAGGAGGCAAGGGATCGGTGTGGAT</p> <p>GGGATATCCTTCGGGACATGGAGGATGTTCAAGCGCTCCGCAGTGACCTGGGTTGTCC</p> <p>TAGATTGTCTCTGCGTTGCCCTCTCCTCCGCGCAGCCATCCACGGCCGATTGAAGATT</p> <p>TGTCCGGCTGGTCACGCGGACATAGCTTGCGCTCCACGGGGAGCCCAGCTTCCTTGGC</p> <p>CTCAAATCTCGAAATCAGTCAAAGCCCAACTATGGCGTTGCTGAGCCTGCATCACTCT</p> <p>CCTCACGGTCCCTCAAAGTTGTGCGATGAACCGCGCGTAGTCCAGTTCCGGAACCA</p> <p>GCCCCTATGGGATGTCAGGAACCCGAAGAAATGAGCTGGCCGCCGTCTGTTGAGGGA</p> <p>GCAAACCTCTCTGTGCAGAGTAATTCCCCCGTTCTCGGGACCTGGAGGTGGCGGCAG</p> <p>ATGCGAGCCCCGCGAGTCTCCAGAAGCCCCAGAGGCGCCAGAGACAAGCACTCAT</p> <p>TACCCCGTGGAATGTACGGAAGAGCCGGCCGCGCCGAAAAGTCTCCCTAGTCCTTCC</p> <p>AGGAATGCGAGTCCGGATGTTACGGACCAAAAGCCACCGCTCCACTTGTCTGAAGAG</p> <p>GATACCACGTATCCTACTGCGCAGCCACATCCTCCTACACCCTCAGTGCCCCAAACAT</p> <p>CCCCGCCATTCCCGTCCCCGTCTACGCTCTCTAGCGCGCCACCTACGGTGAGTAACCC</p> <p>TTCCCCGCCTGCCCCGAACTCGAATTGAGCGAGCAGAAATTCTACAATTTTGTGGTG</p> <p>CTGCATGCCGGCGCCGACGAACATATTGCCCTGAGGGTGAGGGAGAAGCTCGAATCT</p> <p>CTTGCGGTTTCGCGATGGTTCGACATTCTGTGAGGATTTCCAGGTCCCCGGTCGCGGTC</p> <p>AGCTGAGGTGCCTTCAAGACGCTCTGGACCATAGCGCGTTTACCATCCTGCTGTTGAC</p> <p>CCCCAACTTTGACTGTGCGCTGAGCCAACATCAAGCCAATCAATCCTTGATGAGCAGC</p> <p>CTGACACGGCCAGGTTGGCAAGATTGTGTTATACCATTTCTCCCGTTGGAGTCCTCCCT</p> <p>GGCACAACCTCTCACCTGGTACGAGCAGCTTGTTGAGCTCACTGGTGTGGCTTGACGAA</p> <p>CACAGCCAGATCTTCGCACGCAAAGTCGCCAATACCTTCAAACCGCAGAAACTTCGG</p> <p>GCTAGAAAGGCAAAATGGCGCAAAGAACAAGACGCCAGAGCACTCCGCGAGCAGTC</p> <p>CCAGCACCTCGAGGGCGAACGCCAACAGGCTGCGGCATGGGGTGCTGCCTGTTTCAGC</p> <p>TTATATACACAGCTACCTTTCTTACCAGACACAATTGGAAAAGCTGCAAATGGCCTTT</p> <p>GCCAGTTACATGCCGTTTCGGAGCCCAGCTCCCTAGTGCTCCCCAGCTCCTTTCGGCG</p> <p>AACAGGGACCGCTGGGCGCTCCACCGCCTTTTCCACCTGGCCCCGTTTGCAACCCCC</p> <p>TCCAGTTAGTCCCTGGTTGGCGGGAACACCTCCGCCGGCATTCCCCAACCTCCGGCT</p> <p>TTTCTCAACCACCAGCGTTCCCTCAACCTCCTGCGTTTCCCCAACCAACCCGCTGCAA</p> <p>GCCAGTCCAGTCCTGTCAATCCACAGTCAAGTGGAGTCCAACCTTTGATAATCCACCA</p> <p>CGCTCAGATGGTGCAGCTGGGACTGAATAATCATATGTGGAATCAAAGAGGGACTCA</p> <p>GGCCCCGGAGGATAAGTCACCGGAAACGCAAGAGCAGAAGTTGATCTCCGAAGAAG</p> <p>ATTTGTAAAGCTAGCAGATCTTTTT</p> |
|---------------------------------------------------------|------------------------------------------------------------------------------------------------------------------------------------------------------------------------------------------------------------------------------------------------------------------------------------------------------------------------------------------------------------------------------------------------------------------------------------------------------------------------------------------------------------------------------------------------------------------------------------------------------------------------------------------------------------------------------------------------------------------------------------------------------------------------------------------------------------------------------------------------------------------------------------------------------------------------------------------------------------------------------------------------------------------------------------------------------------------------------------------------------------------------------------------------------------------------------------------------------------------------------------------------------------------------------------------------------------------------------------------------------------------------------------------------------------------------------------------------------------------------------------------------------------------------------------------------------------------------------------------------------------------------------------------------------------------------------------------------------------------------------------------------------------------------------------------------------------------------------------------------------------------------------------------------------------------------------------------------------------------------------------------------------------------------------------------------------------------------------------------------------------------------------------------------------------------------------------------------------------------------------------------------------------------------------------------------------------------------------------------------------------------------------------------------------------------------------------------------------------------------------------------------------------------------------------------------------------------------------------------------------------------------|

Supplementary Table S3. The oligonucleotides used to quantify ISGs mRNA levels

5

| Primer         | Forward (5' - 3')       | Reverse (5' - 3')      |
|----------------|-------------------------|------------------------|
| <i>Mx1</i>     | TACGACATCGAATACCAGATCAA | ATGGTCCTGTCTCCTTCGG    |
| <i>Isg15</i>   | GACTGCATGATGGCATCGGA    | TGCACCATCAACAGGACCAT   |
| $\beta$ -actin | TGGATAAGCCTGCAGTCACAG   | GCGTAGAGGTCCTTCCTGATGT |

6
