# Supplementary material for: Conserved Antagonization of Type I Interferon Signaling by Arterivirus GP5 Proteins
Source: Preprints.org preprint supplement (doi:10.20944/preprints202407.0166.v1), 2024-07-02
Supplement: Supplementary file 3 [file supplementary]

**A**

|                  |        |                  |        |        |           |              |        |         |           |        |        |                  |        |        |             |        |        |            |        |        |            |       |
|------------------|--------|------------------|--------|--------|-----------|--------------|--------|---------|-----------|--------|--------|------------------|--------|--------|-------------|--------|--------|------------|--------|--------|------------|-------|
| VR2332           | 100%   |                  |        |        |           |              |        |         |           |        |        |                  |        |        |             |        |        |            |        |        |            |       |
| RespPRRS vaccine | 98.50% | 100%             |        |        |           |              |        |         |           |        |        |                  |        |        |             |        |        |            |        |        |            |       |
| P129             | 90.50% | 90.50%           | 100%   |        |           |              |        |         |           |        |        |                  |        |        |             |        |        |            |        |        |            |       |
| 01NP1            | 85.92% | 86.93%           | 88.44% | 100%   |           |              |        |         |           |        |        |                  |        |        |             |        |        |            |        |        |            |       |
| Prime Pac        | 92.50% | 92%              | 94.50% | 89.44% | 100%      |              |        |         |           |        |        |                  |        |        |             |        |        |            |        |        |            |       |
| Ingelvac ATP     | 90%    | 89.50%           | 94.50% | 88.44% | 92.50%    | 100%         |        |         |           |        |        |                  |        |        |             |        |        |            |        |        |            |       |
| JXA1             | 87.50% | 87%              | 91.50% | 88.44% | 91.50%    | 90%          | 100%   |         |           |        |        |                  |        |        |             |        |        |            |        |        |            |       |
| MN30100          | 90.50% | 90%              | 94%    | 85.92% | 92.50%    | 92.50%       | 89%    | 100%    |           |        |        |                  |        |        |             |        |        |            |        |        |            |       |
| 2000-5424        | 90.50% | 90%              | 95.50% | 87.43% | 93%       | 94.50%       | 90.50% | 96%     | 100%      |        |        |                  |        |        |             |        |        |            |        |        |            |       |
| Neb-1            | 93.50% | 93%              | 95.50% | 90.45% | 99%       | 93.50%       | 92.50% | 93.50%  | 94%       | 100%   |        |                  |        |        |             |        |        |            |        |        |            |       |
| CH-1R            | 89.50% | 89%              | 95.50% | 86.43% | 93%       | 93.50%       | 91.50% | 92.50%  | 94%       | 94%    | 100%   |                  |        |        |             |        |        |            |        |        |            |       |
| PRRSV0000 008973 | 86%    | 85.50%           | 88.50% | 88.44% | 89.50%    | 86.50%       | 87%    | 88%     | 88.50%    | 90%    | 88%    | 100%             |        |        |             |        |        |            |        |        |            |       |
| HG.RV2           | 87.50% | 88%              | 92.50% | 89.44% | 92%       | 89.50%       | 98.50% | 89%     | 90%       | 93%    | 91%    | 87.50%           | 100%   |        |             |        |        |            |        |        |            |       |
| NADC30           | 84%    | 84%              | 87.50% | 91.45% | 87%       | 87.50%       | 86%    | 86%     | 87%       | 88%    | 86%    | 85.50%           | 85.50% | 100%   |             |        |        |            |        |        |            |       |
| GXLA12-2012      | 82%    | 82%              | 85%    | 83.41% | 84.50%    | 83.50%       | 83%    | 83.50%  | 84%       | 85.50% | 83.50% | 80.50%           | 82%    | 86%    | 100%        |        |        |            |        |        |            |       |
| XW008            | 87.50% | 87.50%           | 91.50% | 86.43% | 90.50%    | 90.50%       | 88.50% | 93.50%  | 92%       | 91.50% | 90.50% | 89%              | 88.50% | 86.50% | 82%         | 100%   |        |            |        |        |            |       |
| MD001            | 84.50% | 84%              | 89.50% | 85.42% | 88.50%    | 88.50%       | 88%    | 87%     | 89.50%    | 89.50% | 88.50% | 83%              | 87%    | 85.50% | 89.50%      | 85%    | 100%   |            |        |        |            |       |
| Sar01/2013       | 97.50% | 99%              | 90.50% | 86.93% | 92%       | 90%          | 87%    | 90.50%  | 90.50%    | 93%    | 89%    | 85.50%           | 88%    | 84%    | 82%         | 88%    | 84.50% | 100%       |        |        |            |       |
| EDRD-1           | 89%    | 88.50%           | 90%    | 89.44% | 92.50%    | 90.50%       | 89%    | 88%     | 88.50%    | 93.50% | 88%    | 84.50%           | 89.50% | 87%    | 85.50%      | 85.50% | 87.50% | 88.50%     | 100%   |        |            |       |
| GD               | 88%    | 87.50%           | 92%    | 88.94% | 92%       | 90.50%       | 99.50% | 89.50%  | 91%       | 93%    | 92%    | 87.50%           | 99%    | 86.50% | 83%         | 89%    | 88%    | 87.50%     | 89.50% | 100%   |            |       |
| Miyagi08-2       | 87%    | 86.50%           | 89%    | 87.93% | 91%       | 88%          | 88%    | 88%     | 88.50%    | 91.50% | 88%    | 84.50%           | 87.50% | 87%    | 84%         | 86%    | 87%    | 86.50%     | 92%    | 88.50% | 100%       |       |
| Zad-1            | 54.50% | 53.50%           | 54%    | 53.26% | 53.50%    | 52.50%       | 54.50% | 53.50%  | 53.50%    | 54.50% | 54.50% | 53.50%           | 55%    | 53%    | 51.50%      | 53%    | 53%    | 54%        | 53%    | 55%    | 52.50%     | 100%  |
|                  | VR2332 | RespPRRS vaccine | P129   | 01NP1  | Prime Pac | Ingelvac ATP | JXA1   | MN30100 | 2000-5424 | Neb-1  | CH-1R  | PRRSV000 0008973 | HG.RV2 | NADC30 | GXLA12-2012 | XW008  | MD001  | Sar01/2013 | EDRD-1 | GD     | Miyagi08-2 | Zad-1 |

B

|                  |        |                  |        |        |           |              |        |         |           |        |        |                  |        |        |             |        |        |            |        |        |            |       |
|------------------|--------|------------------|--------|--------|-----------|--------------|--------|---------|-----------|--------|--------|------------------|--------|--------|-------------|--------|--------|------------|--------|--------|------------|-------|
| VR2332           | 100%   |                  |        |        |           |              |        |         |           |        |        |                  |        |        |             |        |        |            |        |        |            |       |
| RespPRRS vaccine | 98.50% | 100%             |        |        |           |              |        |         |           |        |        |                  |        |        |             |        |        |            |        |        |            |       |
| P129             | 91.50% | 91.50%           | 100%   |        |           |              |        |         |           |        |        |                  |        |        |             |        |        |            |        |        |            |       |
| 01NP1            | 89.94% | 90.45%           | 91.95% | 100%   |           |              |        |         |           |        |        |                  |        |        |             |        |        |            |        |        |            |       |
| Prime Pac        | 93%    | 92.50%           | 95%    | 93.46% | 100%      |              |        |         |           |        |        |                  |        |        |             |        |        |            |        |        |            |       |
| Ingelvac ATP     | 92%    | 91.50%           | 96%    | 92.96% | 94%       | 100%         |        |         |           |        |        |                  |        |        |             |        |        |            |        |        |            |       |
| JXA1             | 90.50% | 90%              | 92.50% | 91.95% | 94%       | 92.50%       | 100%   |         |           |        |        |                  |        |        |             |        |        |            |        |        |            |       |
| MN30100          | 92%    | 91.50%           | 95.50% | 90.45% | 94%       | 93.50%       | 91.50% | 100%    |           |        |        |                  |        |        |             |        |        |            |        |        |            |       |
| 2000-5424        | 92%    | 91.50%           | 96%    | 91.95% | 94%       | 95%          | 92.50% | 96.50%  | 100%      |        |        |                  |        |        |             |        |        |            |        |        |            |       |
| Neb-1            | 94%    | 93.50%           | 96%    | 94.47% | 99%       | 95%          | 95%    | 95%     | 95%       | 100%   |        |                  |        |        |             |        |        |            |        |        |            |       |
| CH-1R            | 91%    | 90.50%           | 96%    | 90.45% | 94%       | 95%          | 92.50% | 94%     | 95%       | 95%    | 100%   |                  |        |        |             |        |        |            |        |        |            |       |
| PRRSV0000 008973 | 89.50% | 89%              | 91%    | 91.45% | 92.50%    | 90%          | 89%    | 91%     | 91.50%    | 93%    | 90%    | 100%             |        |        |             |        |        |            |        |        |            |       |
| HG.RV2           | 90.50% | 91%              | 93.50% | 92.96% | 94.50%    | 92%          | 98.50% | 92%     | 92%       | 95.50% | 92%    | 89.50%           | 100%   |        |             |        |        |            |        |        |            |       |
| NADC30           | 89%    | 88.50%           | 92%    | 93.46% | 92%       | 93.50%       | 90.50% | 91.50%  | 92%       | 93%    | 91%    | 89.50%           | 90%    | 100%   |             |        |        |            |        |        |            |       |
| GXLA12-2012      | 85%    | 84.50%           | 88%    | 87.93% | 87.50%    | 87.50%       | 87%    | 87.50%  | 87.50%    | 88.50% | 87%    | 86%              | 86%    | 89.50% | 100%        |        |        |            |        |        |            |       |
| XW008            | 90.50% | 90%              | 94%    | 90.45% | 93.50%    | 92.50%       | 92.50% | 94.50%  | 93.50%    | 94.50% | 93%    | 92%              | 93%    | 92%    | 86%         | 100%   |        |            |        |        |            |       |
| MD001            | 87%    | 86.50%           | 91.50% | 90.45% | 91%       | 91%          | 91%    | 89.50%  | 91.50%    | 92%    | 91%    | 87.50%           | 90%    | 90%    | 91.50%      | 88.50% | 100%   |            |        |        |            |       |
| Sar01/2013       | 97.50% | 99%              | 91.50% | 90.45% | 92.50%    | 91.50%       | 90%    | 91.50%  | 91.50%    | 93.50% | 90.50% | 89%              | 91%    | 88.50% | 84.50%      | 90%    | 87%    | 100%       |        |        |            |       |
| EDRD-1           | 90%    | 89.50%           | 93%    | 94.97% | 94.50%    | 93.50%       | 93%    | 91.50%  | 91.50%    | 95.50% | 91%    | 89.50%           | 93.50% | 93%    | 88%         | 90.50% | 91.50% | 89.50%     | 100%   |        |            |       |
| GD               | 91%    | 90.50%           | 93%    | 92.46% | 94.50%    | 93%          | 99.50% | 92%     | 93%       | 95.50% | 93%    | 89.50%           | 99%    | 91%    | 87%         | 93%    | 91%    | 90.50%     | 93.50% | 100%   |            |       |
| Miyagi08-2       | 87.50% | 87%              | 90.50% | 92.46% | 92%       | 90.50%       | 91%    | 90%     | 90.50%    | 92.50% | 90%    | 88.50%           | 90.50% | 91%    | 86.50%      | 89.50% | 90%    | 87%        | 93%    | 91.50% | 100%       |       |
| Zad-1            | 66%    | 65%              | 66.50% | 65.82% | 65%       | 64.50%       | 66.50% | 66.50%  | 66%       | 66%    | 66%    | 64.50%           | 67%    | 67%    | 64.50%      | 67%    | 65.50% | 65.50%     | 65%    | 67%    | 64%        | 100%  |
|                  | VR2332 | RespPRRS vaccine | P129   | 01NP1  | Prime Pac | Ingelvac ATP | JXA1   | MN30100 | 2000-5424 | Neb-1  | CH-1R  | PRRSV000 0008973 | HG.RV2 | NADC30 | GXLA12-2012 | XW008  | MD001  | Sar01/2013 | EDRD-1 | GD     | Miyagi08-2 | Zad-1 |

C

|                             |             |                    |                  |                 |                             |                    |        |                       |               |        |              |        |        |        |             |        |                      |        |             |        |        |             |           |                    |      |
|-----------------------------|-------------|--------------------|------------------|-----------------|-----------------------------|--------------------|--------|-----------------------|---------------|--------|--------------|--------|--------|--------|-------------|--------|----------------------|--------|-------------|--------|--------|-------------|-----------|--------------------|------|
| Lopma virus                 | 100%        |                    |                  |                 |                             |                    |        |                       |               |        |              |        |        |        |             |        |                      |        |             |        |        |             |           |                    |      |
| RtMruf arterivirus          | 35.75%      | 100%               |                  |                 |                             |                    |        |                       |               |        |              |        |        |        |             |        |                      |        |             |        |        |             |           |                    |      |
| RtEi arterivirus            | 35.38%      | 70.98%             | 100%             |                 |                             |                    |        |                       |               |        |              |        |        |        |             |        |                      |        |             |        |        |             |           |                    |      |
| LDV (Isolate p)             | 41.53%      | 49.22%             | 45.22%           | 100%            |                             |                    |        |                       |               |        |              |        |        |        |             |        |                      |        |             |        |        |             |           |                    |      |
| LDV (Neuro-virulent type C) | 38.97%      | 50.77%             | 43.84%           | 83.91%          | 100%                        |                    |        |                       |               |        |              |        |        |        |             |        |                      |        |             |        |        |             |           |                    |      |
| RtClon arterivirus          | 36.78%      | 69.94%             | 62.17%           | 47.66%          | 48.70%                      | 100%               |        |                       |               |        |              |        |        |        |             |        |                      |        |             |        |        |             |           |                    |      |
| MgAV1                       | 35.38%      | 84.45%             | 67.48%           | 50.25%          | 45.32%                      | 69.43%             | 100%   |                       |               |        |              |        |        |        |             |        |                      |        |             |        |        |             |           |                    |      |
| SHFV (LVR 42-0/M6941)       | 29.23%      | 25.38%             | 22.66%           | 24.62%          | 25.23%                      | 23.31%             | 22.62% | 100%                  |               |        |              |        |        |        |             |        |                      |        |             |        |        |             |           |                    |      |
| SHFV (B11661)               | 29.23%      | 25.38%             | 22.66%           | 24.62%          | 25.23%                      | 23.31%             | 22.62% | 99.64%                | 100%          |        |              |        |        |        |             |        |                      |        |             |        |        |             |           |                    |      |
| FSVV                        | 33.33%      | 27.97%             | 29.06%           | 27.13%          | 26.63%                      | 25.90%             | 24.43% | 46.72%                | 46.72%        | 100%   |              |        |        |        |             |        |                      |        |             |        |        |             |           |                    |      |
| Pebjah virus                | 36.41%      | 28.49%             | 28.07%           | 32.66%          | 29.43%                      | 28.49%             | 27.60% | 54.43%                | 54.43%        | 50.81% | 100%         |        |        |        |             |        |                      |        |             |        |        |             |           |                    |      |
| MYBV                        | 35.89%      | 24.35%             | 29.06%           | 28.64%          | 27.57%                      | 25.38%             | 22.17% | 49.21%                | 49.21%        | 52.45% | 54.03%       | 100%   |        |        |             |        |                      |        |             |        |        |             |           |                    |      |
| KKCBV                       | 32.82%      | 25.38%             | 28.57%           | 30.15%          | 28.50%                      | 25.38%             | 23.52% | 48.50%                | 48.50%        | 51.63% | 51.61%       | 60.93% | 100%   |        |             |        |                      |        |             |        |        |             |           |                    |      |
| SHEV                        | 11.53%      | 12.82%             | 11.53%           | 12.82%          | 10.89%                      | 10.89%             | 12.17% | 13.46%                | 13.46%        | 14.10% | 15.38%       | 14.74% | 16.66% | 100%   |             |        |                      |        |             |        |        |             |           |                    |      |
| Praja virus                 | 30.25%      | 31.08%             | 32.51%           | 33.66%          | 31.52%                      | 31.60%             | 29.55% | 22.16%                | 22.16%        | 23.64% | 26.60%       | 26.10% | 28.07% | 12.82% | 100%        |        |                      |        |             |        |        |             |           |                    |      |
| APRA                        | 33.33%      | 30.05%             | 30.04%           | 30.65%          | 28.50%                      | 30.56%             | 26.24% | 27.07%                | 27.07%        | 22.70% | 26.63%       | 25.76% | 24.45% | 12.82% | 36.94%      | 100%   |                      |        |             |        |        |             |           |                    |      |
| Hedgehog arterivirus        | 28.71%      | 31.60%             | 31.52%           | 34.67%          | 30.24%                      | 29.01%             | 30.73% | 20.48%                | 20.48%        | 19.02% | 23.90%       | 23.90% | 19.51% | 15.38% | 34.97%      | 32.68% | 100%                 |        |             |        |        |             |           |                    |      |
| OSV1                        | 23.58%      | 25.38%             | 28.57%           | 28.14%          | 24.75%                      | 24.87%             | 26.69% | 17.96%                | 17.96%        | 23.30% | 21.84%       | 20.38% | 20.38% | 11.53% | 24.13%      | 21.35% | 21.46%               | 100%   |             |        |        |             |           |                    |      |
| EAV (PLD76)                 | 18.46%      | 17.09%             | 16.74%           | 19.09%          | 18.69%                      | 17.61%             | 14.47% | 12.15%                | 12.15%        | 13.52% | 14.91%       | 14.50% | 13.72% | 5.76%  | 14.77%      | 15.72% | 15.12%               | 16.99% | 100%        |        |        |             |           |                    |      |
| ZMV1                        | 30.25%      | 26.42%             | 25.61%           | 25.62%          | 26.16%                      | 25.38%             | 22.62% | 47.71%                | 47.71%        | 78.83% | 48.54%       | 50.20% | 48.54% | 14.74% | 22.16%      | 24.45% | 16.58%               | 22.33% | 12.03%      | 100%   |        |             |           |                    |      |
| DMA                         | 30.76%      | 25.90%             | 27.09%           | 26.13%          | 25.70%                      | 25.38%             | 26.24% | 52.45%                | 52.45%        | 51.63% | 54.83%       | 50%    | 46.03% | 15.38% | 22.16%      | 24.45% | 19.02%               | 21.35% | 13.72%      | 51.86% | 100%   |             |           |                    |      |
| EAV (ARVAC)                 | 18.46%      | 17.09%             | 16.74%           | 19.09%          | 18.69%                      | 17.61%             | 14.47% | 12.54%                | 12.54%        | 13.93% | 15.32%       | 14.90% | 14.11% | 5.76%  | 14.77%      | 15.72% | 15.12%               | 16.99% | 98.43%      | 12.44% | 14.11% | 100%        |           |                    |      |
| EAV (F20)                   | 20%         | 17.61%             | 19.21%           | 20.10%          | 19.62%                      | 19.17%             | 16.28% | 12.54%                | 12.54%        | 14.34% | 14.51%       | 14.90% | 12.54% | 6.41%  | 15.27%      | 14.41% | 16.09%               | 16.01% | 90.19%      | 13.69% | 14.11% | 88.62%      | 100%      |                    |      |
| EAV (GB_Glos 2012)          | 19.48%      | 17.09%             | 19.21%           | 17.58%          | 18.22%                      | 19.17%             | 16.74% | 12.54%                | 12.54%        | 14.34% | 13.70%       | 14.90% | 13.72% | 5.76%  | 15.27%      | 14.41% | 15.60%               | 15.53% | 89.80%      | 15.35% | 14.90% | 88.23%      | 92.94%    | 100%               |      |
| WPDV                        | 8.98%       | 9.55%              | 8.98%            | 12.35%          | 11.79%                      | 8.98%              | 10.67% | 11.79%                | 11.79%        | 12.92% | 10.11%       | 8.42%  | 13.48% | 8.33%  | 8.98%       | 9.55%  | 9.55%                | 10.11% | 8.98%       | 12.92% | 9.55%  | 8.98%       | 9.55%     | 8.98%              | 100% |
|                             | Lopma virus | RtMruf arterivirus | RtEi arterivirus | LDV (Isolate p) | LDV (Neuro-virulent type C) | RtClon arterivirus | MgAV1  | SHFV (LVR 42-0/M6941) | SHFV (B11661) | FSVV   | Pebjah virus | MYBV   | KKCBV  | SHEV   | Praja virus | APRA   | Hedgehog arterivirus | OSV1   | EAV (PLD76) | ZMV1   | DMA    | EAV (ARVAC) | EAV (F20) | EAV (GB_Glos 2012) | WPDV |

D

|                             |             |                    |                  |                 |                             |                    |        |                       |               |        |              |        |        |        |             |        |                      |        |             |        |        |             |           |                    |      |
|-----------------------------|-------------|--------------------|------------------|-----------------|-----------------------------|--------------------|--------|-----------------------|---------------|--------|--------------|--------|--------|--------|-------------|--------|----------------------|--------|-------------|--------|--------|-------------|-----------|--------------------|------|
| Lopma virus                 | 100%        |                    |                  |                 |                             |                    |        |                       |               |        |              |        |        |        |             |        |                      |        |             |        |        |             |           |                    |      |
| RtMruf arterivirus          | 46.11%      | 100%               |                  |                 |                             |                    |        |                       |               |        |              |        |        |        |             |        |                      |        |             |        |        |             |           |                    |      |
| RtEi arterivirus            | 46.66%      | 78.75%             | 100%             |                 |                             |                    |        |                       |               |        |              |        |        |        |             |        |                      |        |             |        |        |             |           |                    |      |
| LDV (Isolate p)             | 50.25%      | 61.13%             | 61.30%           | 100%            |                             |                    |        |                       |               |        |              |        |        |        |             |        |                      |        |             |        |        |             |           |                    |      |
| LDV (Neuro-virulent type C) | 48.20%      | 64.76%             | 58.62%           | 87.93%          | 100%                        |                    |        |                       |               |        |              |        |        |        |             |        |                      |        |             |        |        |             |           |                    |      |
| RtClon arterivirus          | 47.15%      | 80.31%             | 71.50%           | 61.13%          | 62.69%                      | 100%               |        |                       |               |        |              |        |        |        |             |        |                      |        |             |        |        |             |           |                    |      |
| MgAV1                       | 47.17%      | 89.11%             | 75.36%           | 63.31%          | 58.41%                      | 78.75%             | 100%   |                       |               |        |              |        |        |        |             |        |                      |        |             |        |        |             |           |                    |      |
| SHFV (LVR 42-0/M6941)       | 44.61%      | 42.48%             | 36.45%           | 39.19%          | 38.78%                      | 39.37%             | 37.55% | 100%                  |               |        |              |        |        |        |             |        |                      |        |             |        |        |             |           |                    |      |
| SHFV (B11661)               | 44.61%      | 42.48%             | 36.45%           | 39.19%          | 38.78%                      | 39.37%             | 37.55% | 99.64%                | 100%          |        |              |        |        |        |             |        |                      |        |             |        |        |             |           |                    |      |
| FSVV                        | 45.64%      | 43%                | 43.34%           | 40.20%          | 38.78%                      | 41.96%             | 40.27% | 56.14%                | 56.14%        | 100%   |              |        |        |        |             |        |                      |        |             |        |        |             |           |                    |      |
| Pebjah virus                | 48.20%      | 42.48%             | 40.39%           | 44.22%          | 39.25%                      | 40.93%             | 40.72% | 64.91%                | 64.91%        | 59.42% | 100%         |        |        |        |             |        |                      |        |             |        |        |             |           |                    |      |
| MYBV                        | 48.71%      | 41.45%             | 39.90%           | 41.70%          | 39.71%                      | 37.82%             | 37.10% | 60.15%                | 60.15%        | 62.70% | 61.69%       | 100%   |        |        |             |        |                      |        |             |        |        |             |           |                    |      |
| KKCBV                       | 46.66%      | 41.45%             | 39.90%           | 44.72%          | 40.65%                      | 37.82%             | 38.46% | 60.82%                | 60.82%        | 61.47% | 62.09%       | 71.48% | 100%   |        |             |        |                      |        |             |        |        |             |           |                    |      |
| SHEV                        | 20.51%      | 19.23%             | 17.94%           | 21.79%          | 19.87%                      | 19.87%             | 20.51% | 26.92%                | 26.92%        | 23.71% | 24.35%       | 23.71% | 25%    | 100%   |             |        |                      |        |             |        |        |             |           |                    |      |
| Praja virus                 | 37.43%      | 45.59%             | 43.34%           | 43.71%          | 41.37%                      | 44.04%             | 43.34% | 33.49%                | 33.49%        | 36.45% | 36.94%       | 35.46% | 36.94% | 21.15% | 100%        |        |                      |        |             |        |        |             |           |                    |      |
| APRA                        | 45.12%      | 40.93%             | 39.40%           | 41.70%          | 39.71%                      | 42.48%             | 36.19% | 41.48%                | 41.48%        | 36.68% | 37.11%       | 34.49% | 35.37% | 23.07% | 48.76%      | 100%   |                      |        |             |        |        |             |           |                    |      |
| Hedgehog arterivirus        | 36.92%      | 42.48%             | 44.33%           | 43.21%          | 40.48%                      | 43%                | 41.46% | 34.63%                | 34.63%        | 33.17% | 35.12%       | 33.65% | 32.19% | 24.35% | 42.36%      | 43.90% | 100%                 |        |             |        |        |             |           |                    |      |
| OSV1                        | 32.82%      | 36.78%             | 37.43%           | 40.70%          | 36.89%                      | 38.86%             | 39.32% | 31.06%                | 31.06%        | 33.98% | 33%          | 31.06% | 33.49% | 16.66% | 33.49%      | 33.49% | 32.19%               | 100%   |             |        |        |             |           |                    |      |
| EAV (PLD76)                 | 28.20%      | 29.53%             | 28.07%           | 29.14%          | 28.97%                      | 29.53%             | 28.95% | 23.52%                | 23.52%        | 26.63% | 26.20%       | 22.74% | 23.13% | 17.30% | 22.66%      | 27.07% | 23.90%               | 26.69% | 100%        |        |        |             |           |                    |      |
| ZMV1                        | 42.56%      | 44.04%             | 40.88%           | 39.69%          | 40.18%                      | 42.48%             | 38.91% | 58.09%                | 58.09%        | 84.23% | 60.99%       | 61.41% | 60.99% | 25.64% | 35.46%      | 38.86% | 32.19%               | 33.49% | 25.31%      | 100%   |        |             |           |                    |      |
| DMA                         | 44.10%      | 41.45%             | 39.40%           | 39.69%          | 36.91%                      | 38.34%             | 39.36% | 60.37%                | 60.37%        | 59.42% | 60.88%       | 57.42% | 56.22% | 26.28% | 33.99%      | 34.93% | 33.17%               | 32.52% | 22.74%      | 60.99% | 100%   |             |           |                    |      |
| EAV (ARVAC)                 | 28.71%      | 30.05%             | 28.57%           | 29.64%          | 29.43%                      | 29.53%             | 29.41% | 24.31%                | 24.31%        | 27.45% | 27.01%       | 23.52% | 23.92% | 17.30% | 23.15%      | 27.51% | 23.90%               | 26.69% | 98.43%      | 26.14% | 23.52% | 100%        |           |                    |      |
| EAV (F20)                   | 30.76%      | 32.12%             | 31.03%           | 32.16%          | 32.24%                      | 32.64%             | 31.67% | 24.31%                | 24.31%        | 27.04% | 27.01%       | 23.52% | 22.74% | 18.58% | 23.64%      | 27.07% | 25.85%               | 26.69% | 92.15%      | 25.72% | 23.52% | 90.58%      | 100%      |                    |      |
| EAV (GB_Glos 2012)          | 30.25%      | 31.60%             | 30.04%           | 30.65%          | 30.84%                      | 31.08%             | 31.22% | 23.52%                | 23.52%        | 26.22% | 25.80%       | 22.35% | 21.96% | 17.94% | 23.15%      | 26.63% | 25.85%               | 26.21% | 92.54%      | 26.14% | 23.52% | 90.98%      | 95.29%    | 100%               |      |
| WPDV                        | 18.53%      | 20.78%             | 19.10%           | 22.47%          | 23.03%                      | 19.10%             | 22.47% | 22.47%                | 22.47%        | 25.84% | 21.34%       | 21.91% | 24.71% | 12.82% | 17.97%      | 17.97% | 15.73%               | 16.85% | 16.29%      | 25.28% | 21.34% | 16.29%      | 17.41%    | 17.41%             | 100% |
|                             | Lopma virus | RtMruf arterivirus | RtEi arterivirus | LDV (Isolate p) | LDV (Neuro-virulent type C) | RtClon arterivirus | MgAV1  | SHFV (LVR 42-0/M6941) | SHFV (B11661) | FSVV   | Pebjah virus | MYBV   | KKCBV  | SHEV   | Praja virus | APRA   | Hedgehog arterivirus | OSV1   | EAV (PLD76) | ZMV1   | DMA    | EAV (ARVAC) | EAV (F20) | EAV (GB_Glos_2012) | WPDV |

**Supplementary Figure S1**

(A, C) Sequence identity of GP proteins. (B, D) Sequence similarity of GP5 proteins. Sequence identity and similarity were calculated by Sequence Identities and Similarities website ([http://imed.med.ucm.es/cgi-bin/sias\\_new.cgi?jobid=1710329285](http://imed.med.ucm.es/cgi-bin/sias_new.cgi?jobid=1710329285), accessed on 14 June 2024).

6

7

8

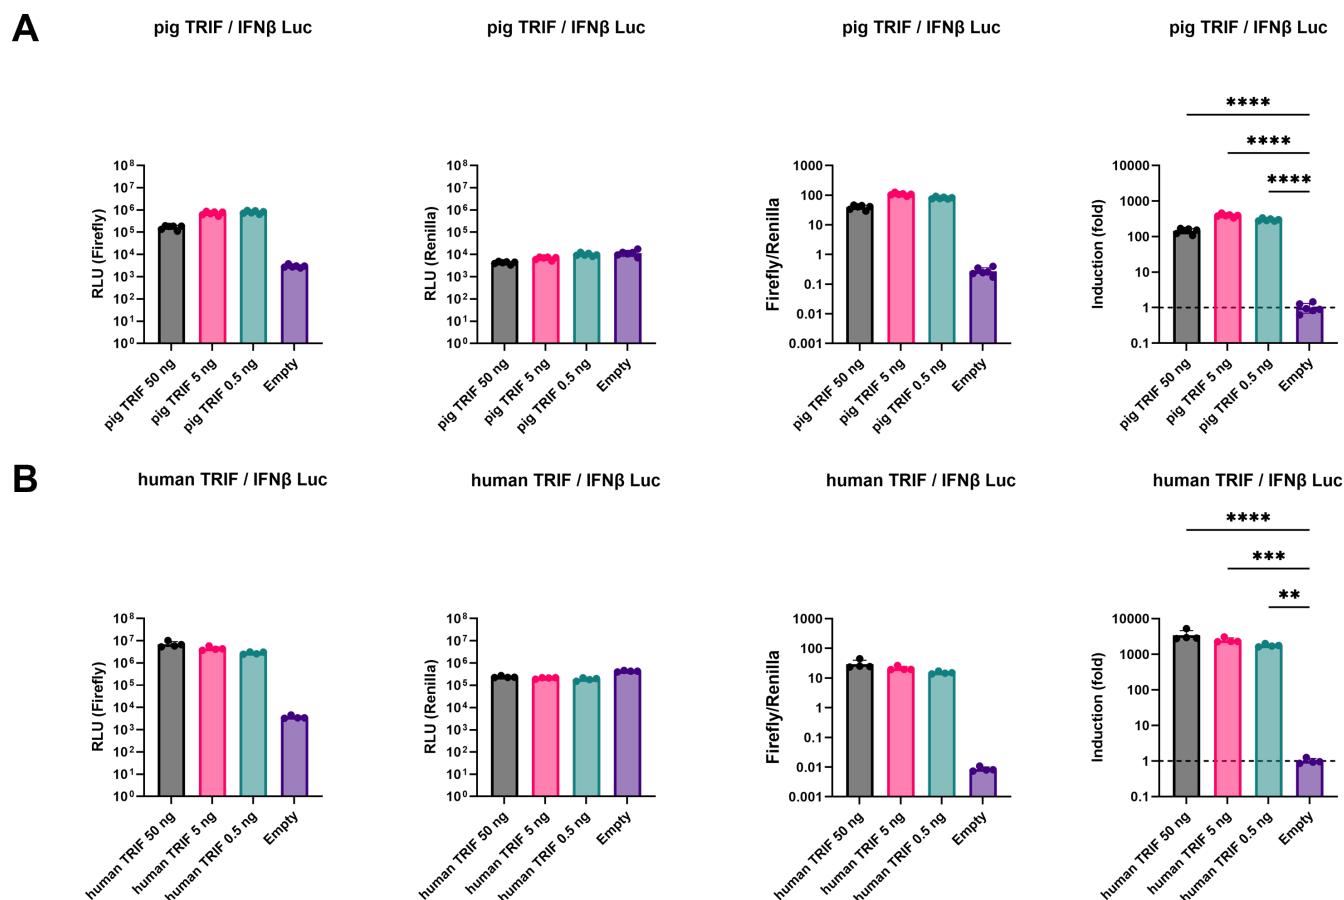

**Supplementary Figure S2. Induction of Firefly luciferase upon co-transfection of IFN- $\beta$  Luc and TRIF plasmids.**

Lenti-X 293T cells co-transfected with (A) IFN- $\beta$  Luc plasmid and 50, 5, 0.5 ng pig TRIF plasmid, (B) IFN- $\beta$  Luc plasmid and 50, 5, 0.5 ng human TRIF plasmid. Differences between TRIF plasmids and an empty plasmid as examined by one-way ANOVA followed by Dunnett's multiple comparison test. \*\*\*\* $p$  < 0.0001, \*\*\* $p$  < 0.001, and \*\* $p$  < 0.01.

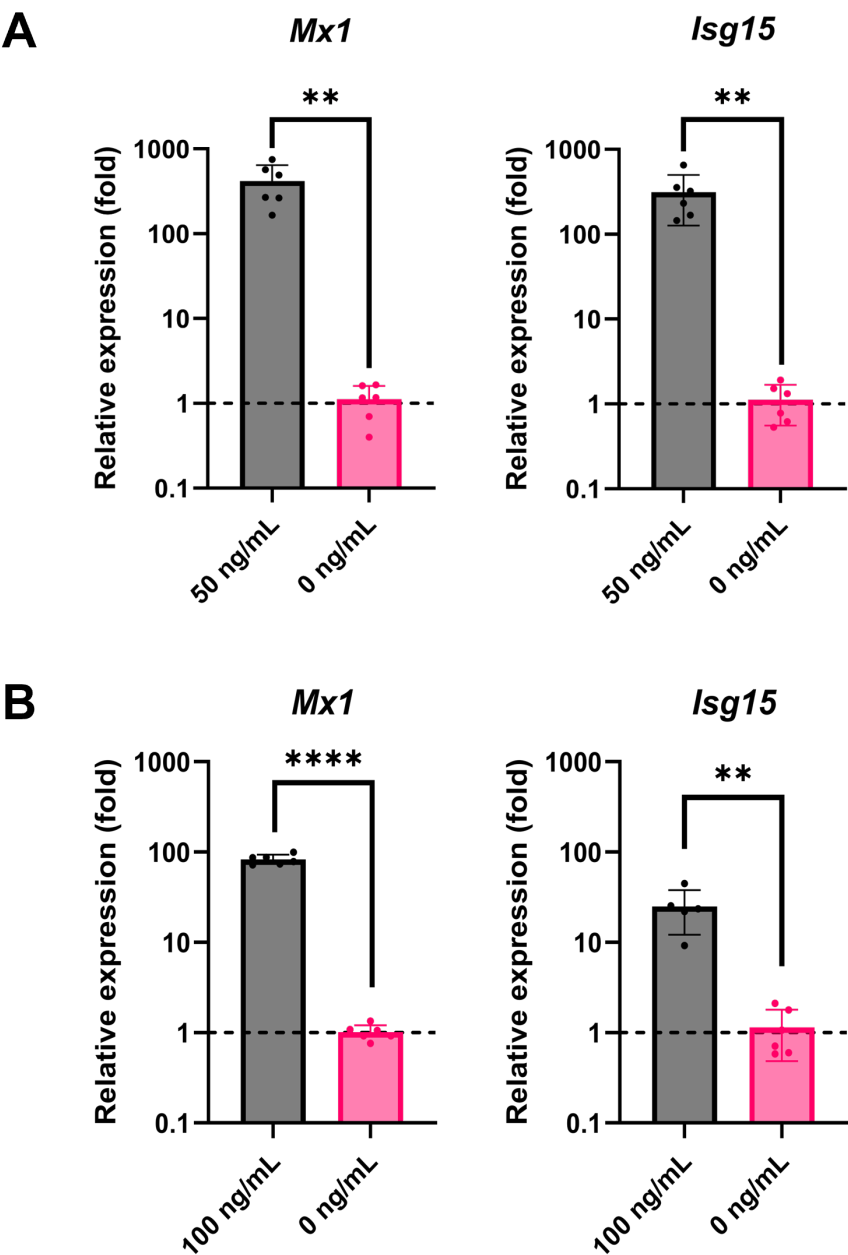

**Supplementary Figure S3. IFN-stimulated gene (ISG) induction by Poly (I:C) or IFN-β.**

Induction of ISG mRNA in SK-6 cells upon poly (I:C) or IFN-β treatment. The results show the mean and standard deviation of sextuplicate measurements from one representative assay. **(A)** ISG induction upon 50 ng/mL poly (I:C) treatment in SK-6 cells. **(B)** Induction of ISG mRNA under 100 ng/mL IFN-β treatment in SK-6 cells. Differences between untreated cells and 50 ng/mL poly (I:C) or 100 ng/mL IFN-β treated cells as examined by two-tailed, unpaired Student's t-test. \*\*\*\* $p < 0.0001$  and \*\* $p < 0.01$ .
